1

2

3

4

5

6

7

8

9

## **Hydrophobic mismatch effect is a key factor in**

10

## **protein transport on the Tat pathway**

11

12

Binhan Hao, Wenjie Zhou and Steven M. Theg

13

14

Plant Biology Department, University of California, Davis, CA 95616

15

16

17

May 26, 2021

18

19

20

21

22

23

For correspondence e-mail: [smtheg@ucdavis.edu](mailto:smtheg@ucdavis.edu)

24

25

### **Abstract**

26 The twin-arginine translocation (Tat) pathway transports folded proteins across  
27 membranes in bacteria, thylakoid, plant mitochondria, and archaea. In most species, the  
28 active Tat machinery consists of three independent subunits, TatA, TatB and TatC.  
29 TatA and TatB from all bacterial species possess short transmembrane alpha-helices  
30 (TMHs), both of which are only fifteen residues long in *E. coli*. Such short TMHs cause  
31 a hydrophobic mismatch between Tat subunits and the membrane bilayer. Here, by  
32 modifying the length of the TMHs of *E. coli* TatA and TatB, we access the functional  
33 importance of the hydrophobic mismatch in the Tat transport mechanism. Surprisingly,  
34 both TatA and TatB with as few as 11 residues in their respective TMHs are still able to  
35 insert into the membrane bilayer, albeit with a decline in membrane integrity. Three  
36 different assays, both qualitative and quantitative, were conducted to evaluate the Tat  
37 activity of the TMH length mutants. Our experiments indicate that the TMHs of TatA  
38 and TatB appear to be evolutionarily tuned to 15 amino acids, with activity dropping  
39 off with any modification of this length. We believe our study supports a model of Tat  
40 transport utilizing localized toroidal pores that form when the membrane bilayer is  
41 thinned to a critical threshold. In this context, the 15-residue length of the TatA and  
42 TatB TMHs can be seen as a compromise between the need for some hydrophobic  
43 mismatch to allow the membrane to reversibly reach the threshold thinness required for  
44 toroidal pore formation, and the permanently destabilizing effect of placing even  
45 shorter helices into these energy-transducing membranes.

46

47

## **Introduction**

48 The twin-arginine translocation (Tat) pathway, which is found in prokaryotes,  
49 archaeobacteria, chloroplasts thylakoids and some mitochondria, is able to transport  
50 multiple substrate proteins across the membrane lipid bilayers. In chloroplasts, this  
51 pathway is responsible for the transport of a number of essential proteins, including two  
52 of the three subunits of the oxygen-evolving complex (Clark and Theg, 1997). In  
53 bacteria, the Tat pathway serves several critical biological processes, including electron  
54 transport, cell division, cell wall formation, stress tolerance, and pathogenesis (Ize et  
55 al., 2003; Palmer et al., 2005). The Tat pathway has the following unusual  
56 characteristics. First, it has the ability to transport folded proteins, which is  
57 fundamentally different from, for instance, the mitochondrial import and the ubiquitous  
58 Sec pathways. Second, Tat pathway substrates have a unique cleavable signal peptide  
59 which carries a nearly invariant pair of arginines (-R-R-) (New et al., 2018). Third, this  
60 pathway uses the protonmotive force (PMF) as the sole energy source, with no  
61 contribution from NTP hydrolysis (Braun et al., 2007). Fourth, the Tat pathway acts in  
62 an ion-tight manner while transporting substrates of different sizes (Asher and Theg,  
63 2021; Teter and Theg, 1998). Fifth, the complete translocation machinery assembles  
64 only transiently during the transport event (Mori and Cline, 2002). Even though Tat  
65 pathway can transport folded proteins with different sizes, the Tat translocon, in most  
66 species, involves only three functionally independent subunits, TatA, TatB and TatC. It  
67 has been shown that TatA, TatB and TatC form a protein complex which serves as the  
68 receptor for Tat signal peptide (Gérard and Cline, 2007; Habersetzer Johann et al., 2017;  
69 Taubert et al., 2015). The assembly into a functional translocon that includes TatA  
70 depends on substrate binding and the PMF. Finally, even though TatB and TatC are  
71 present in a 1:1 stoichiometry, TatA joins the complex in variable stoichiometries  
72 (Leake et al., 2008).

73

74 Recently, the structures of the three Tat subunits have been reported (Hu et al., 2010;

75 Rollauer et al., 2012; Zhang et al., 2014b). TatA and TatB share an overall “L-shape”  
76 conformation composed of an N-terminal undefined short region located in the  
77 periplasm in bacteria, a remarkably short transmembrane alpha helix (TMH), a hinge  
78 region followed by one or more amphipathic helices (APH), and an unstructured C-  
79 terminal tail. In contrast, TatC has six transmembrane helices and is configured in a  
80 cupped hand shape with both N-terminal and C-terminal located in the cytoplasm.  
81 Unexpectedly, there is no apparent channel-like structure in the Tat subunits, such as is  
82 observed in, for instance, the Sec translocon (Tsirigotaki et al., 2017). It has been  
83 suggested that transport in this pathway utilizes lipid-lined toroidal pores that form in  
84 membranes destabilized by the Tat machinery, substrate and PMF (Asher and Theg,  
85 2021; Brüser and Sanders, 2003).

86

87 Although there is no detailed information about the structure of the active Tat  
88 machinery, a special structural feature in the TatA and TatB TMHs potentially point to  
89 an active role of the membrane biophysics in the mechanism of Tat pathway. In *E.*  
90 *coli*, the TMHs of TatA and TatB only have 15 amino acids, respectively, which  
91 makes the length of TMHs (~22.5 Å) much shorter than the normal thickness of the  
92 hydrophobic core of the membrane (30Å) (Mitra et al., 2004). The difference between  
93 the length of the TMHs and the thickness of membrane bilayer cause a hydrophobic  
94 mismatch effect. Many studies have shown that the activity of membrane proteins can  
95 be sensitive to such mismatch (Brandizzi et al., 2002; Milovanovic et al., 2015; Parton  
96 et al., 2011). The possible consequences of the hydrophobic mismatch between short  
97 TMHs and lipid bilayers are various and depend on the overall topology of the  
98 proteins. One of the outcomes is protein aggregation or oligomerization (Killian,  
99 1998), which can cause proximal thinning of the membrane bilayer. Such protein  
100 oligomerization phenomenon is also observed in TatA, which forms higher order  
101 structures in the resting state of Tat transport (Dabney-Smith et al., 2006a; Palmer and  
102 Berks, 2012).

103

104 It remains unclear that whether such hydrophobic mismatch between Tat subunits and  
105 membrane bilayer is necessary for the Tat pathway. A previous study showed that the  
106 short TMH of TatA (without the APH) can destabilize the membrane in inverted  
107 membrane vesicles (IMVs), even though the full-length TatA does not show a similar  
108 proton leakage effect. Such membrane destabilization could potentially be involved in  
109 the formation of competent toroidal pores (Hou et al., 2018).

110

111 In the present study, we investigate the hydrophobic mismatch between Tat subunits  
112 and the membrane bilayer by modifying the length of the TMHs of *E. coli* TatA and  
113 TatB. Up to five amino acids were added to the TMHs at three different loci to decrease  
114 the hydrophobic mismatch. Conversely, up to four amino acids were deleted from the  
115 TMHs to increase the hydrophobic mismatch. The effects of these changes in TMH  
116 lengths were examined by three different measures of Tat activity, both qualitative and  
117 quantitative. We found that the hydrophobic mismatch between Tat subunits and  
118 membrane bilayer appears to be optimized for maximal Tat activity. We further found  
119 that decreasing the length of the TatA TMH caused leakage of protons, and presumably  
120 other ions, across the membrane. These findings offer the insights into functional  
121 importance of the unusually short TMHs of TatA and TatB for the mechanism of Tat  
122 translocation.

123

124

## Results

125

**A conserved 12 amino acid-long hydrophobic region is present in TatA and**

126

**TatB across different species**

127

The *E. coli* TatA and TatB TMHs each consist of 15 residues (Ile6-Phe20 in the TatA

128

and Phe6-Leu20 in the TatB) according to the NMR structures (Zhang et al., 2014a,

129

2014b). In *Bacillus subtilis*, a gram-positive bacteria, the TatA<sub>d</sub> also includes a TMH

130

with 15-residues (Ile7- Phe21) (Hu et al., 2010). To access whether the length of these

131

short TMHs is conserved across different species, 122 TatA and 60 TatB sequences

132

from bacteria, chloroplasts and mitochondria were aligned by MUSCLE (Figure 1A

133

and 1B). Consistent with the previous literature (Barrett et al., 2003), Phe(F)-Gly(G)

134

and Gly(G)-Pro(P) motifs were observed in the TatA and TatB alignments, respectively,

135

and a conserved polar amino acid locus (#8 in the TatA and TatB sequence logo plots)

136

was also observed. Unexpectedly, a 12-residue hydrophobic region between the polar

137

residue (position #8) and the glycine (position #21) is found to be extremely conserved

138

among all TatA and TatB sequences analyzed. Such conservation of the length of the

139

TatA and TatB TMHs across species which display somewhat different membrane

140

bilayer thicknesses (Mitra et al., 2004; Perkins et al., 1997; Pribil et al., 2014) suggests

141

that the length of the TatA and TatB TMH has potential significance for the Tat transport

142

mechanism.

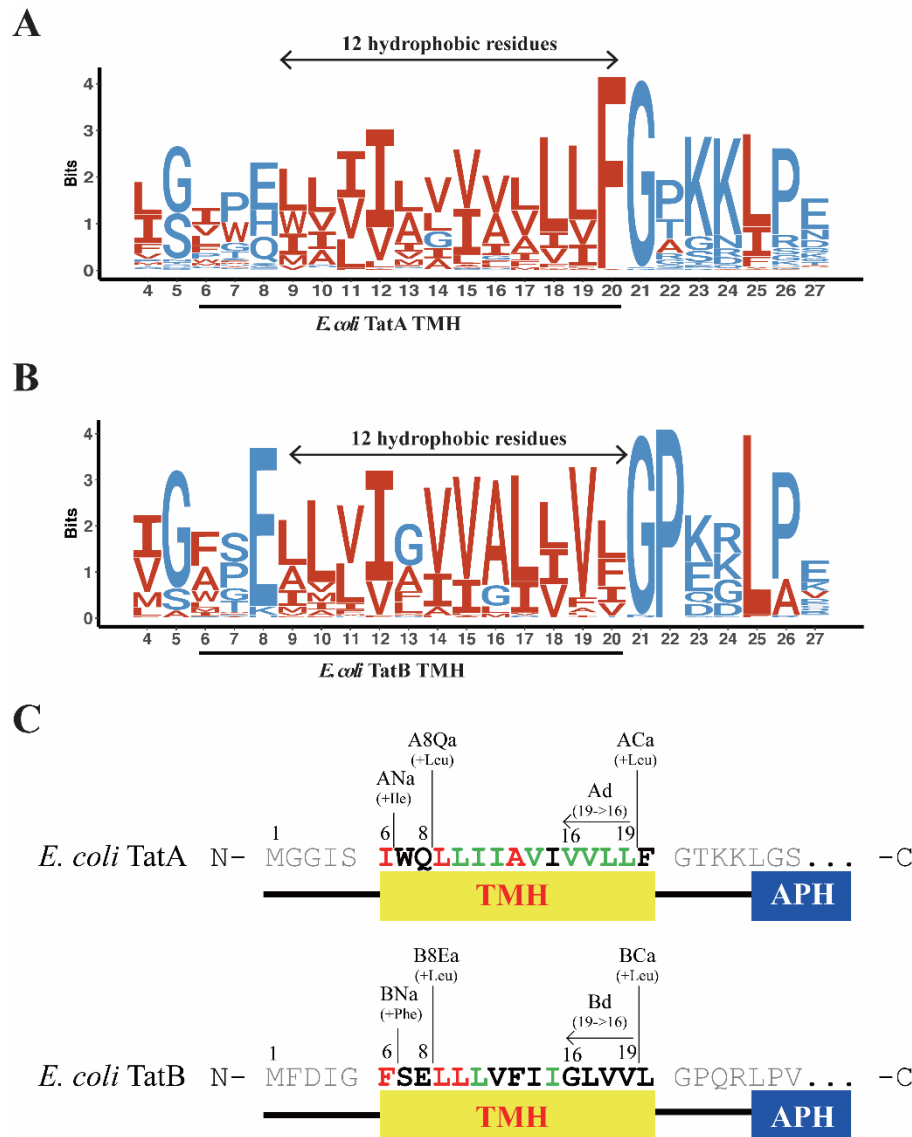

143

144 **Figure 1. Sequence alignments of TatA and TatB TMH and schematic diagrams for mutant**  
 145 **design.** (A,B) Sequence logos for prokaryotic TatA and TatB alignments, respectively. 122 TatA  
 146 sequences and 60 TatB sequences were downloaded from GenBank and subjected to multiple  
 147 sequence alignment using MUSCLE. Sequence logos were subsequently generated using  
 148 ggseqlogo in RStudio, where *E. coli* TatA and TatB numbering was used to denote residue  
 149 locations. Hydrophobic residues were represented in red, and hydrophilic residues were  
 150 represented in blue. An invariant 12-residue long hydrophobic region is present in both TatA and  
 151 TatB and is highlighted by arrows. (C) Schematic diagram for the design and naming of *E. coli*  
 152 TatA and TatB TMH mutants.

153

154 **TMHs with only 15 residues are not common**

155 The 15-residue length of the TatA and TatB TMHs is remarkable in that they are  
 156 expected to be longer to span the 30 Å hydrophobic core of a typical membrane (Figure

157 2A). In order to understand how common such short TMH lengths are, we analyzed the  
158 TMH lengths in thousands of single-pass proteins from bacteria and chloroplasts.  
159 Figure 2B demonstrates that, as expected, such short-length TMHs are relatively rare,  
160 suggesting again that there is some functional significance to this feature of TatA and  
161 TatB.  
162

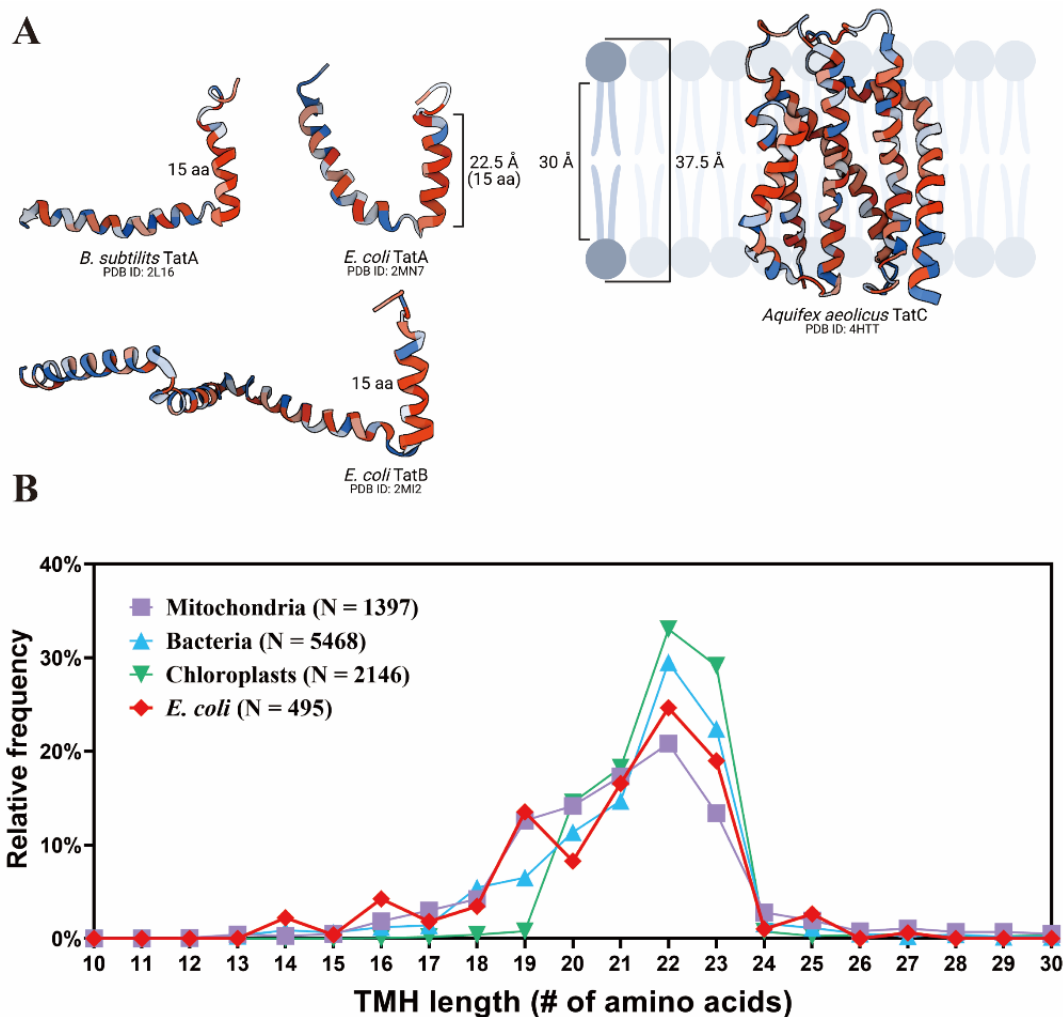

163  
164 **Figure 2. Frequency of short TMHs in selected organelles and organisms.** (A)  
165 Representation of the hydrophobic mismatch between Tat subunits and the membrane bilayer.  
166 Protein structure was obtained from the Protein Data Bank. (B) Statistical analysis of the TMH  
167 length of proteins across different species. TMH length for each protein was predicted by  
168 TMHMM Server, v.2.0, which was then rounded to the nearest integer. Relative frequency in  
169 percentages was obtained by calculating the ratio of the number of proteins with predicted TMH at  
170 the indicated length to the total number of proteins in the corresponding category (mitochondria,  
171 bacteria, chloroplast, and *E. coli*). N, the total number of entries in each category. Further details  
172 are in Materials and Methods.



173        **Experimental modification and nomenclature for TMH-length modifications**  
174        **in TatA and TatB**

175        To better understand how subunit hydrophobic mismatch contributes to Tat transport,  
176        we modified the lengths of the TMHs by adding or deleting amino acids from *E. coli*  
177        TatA and TatB. Four structural and functional principles were considered to minimize  
178        the effect on the overall topology of the TatA and TatB subunits when lengthening or  
179        shortening the TMHs. First, as the TMHs are  $\alpha$ -helices, modifying the number of  
180        amino acids contained therein changes not only the length but also the potential protein-  
181        interacting helix faces. In order to minimize the relative rotation from subunit interfaces  
182        and APH orientation, amino acids were added close to the helix termini, rather than in  
183        the middle. Second, for the same reason, amino acid deletions were performed at the  
184        helix C-terminus. Third, we avoided deleting the conserved residues and functional  
185        groups in the TMHs. Fourth, we added the same amino acids as the one adjacent to the  
186        addition location. Based on those principles, three different loci were selected for the  
187        addition of one to five amino acids to lengthen the TMHs, and one location was selected  
188        to delete one to four amino acids to shorten the TMHs. The various length mutants  
189        include the following: First, the TatA N-terminus addition (**ANa**) group and the TatB  
190        N-terminus addition (**BNa**) group in which amino acids were added at the extreme N-  
191        terminus of the TMHs. Second, the TatA 8<sup>th</sup> Glutamine addition (**A8Qa**) group and the  
192        TatB 8<sup>th</sup> Glutamate addition (**B8Ea**) group in which residues were added immediately  
193        following the polar amino acid in the TatA or TatB TMHs. Third, the TatA C-terminus  
194        addition (**ACa**) group and the TatB C-terminus addition (**BCa**) group, in which residues  
195        were added at the extreme C-terminus of the TMHs before the conserved 19<sup>th</sup> Phe in  
196        TatA or the 19<sup>th</sup> Leu, in the TatB. For deletion mutants, up to four amino acids before  
197        the 19<sup>th</sup> Phe (in TatA) or the 19<sup>th</sup> Leu (in TatB) were deleted step by step from the C- to  
198        N- terminus direction and are named the TatA deletion (**Ad**) group and TatB deletion  
199        (**Bd**) group. For example, “Ad2” represents the mutant whose 19<sup>th</sup> Valine and 18<sup>th</sup>  
200        Valine from the TatA TMH were deleted. Figure 1C shows the detailed design described

201 above for all the mutants.

202

203 **TatA and TatB deletion mutants exhibited lower membrane insertion stability**

204 An obvious challenge for membrane proteins with short TMHs is correct and stable  
205 insertion into the membrane. To assess the membrane stability of our mutant proteins,  
206 membranes were isolated from whole cells and treated with 100 mM sodium carbonate  
207 to wash off non-integrated membrane proteins. According to the Western-blot results  
208 (Supplemental Figure 1), all the TatA and TatB addition mutants exhibited the expected  
209 stable membrane insertion ability. In contrast, a decrease in the membrane abundance  
210 was observed in the Ad and Bd deletion groups (Figure 3A and 3B). The amount of  
211 membrane-embedded TatA in the Ad group averaged approximately 20% of the amount  
212 found in the wild-type (Figure 3A). Similarly, all Bd mutants displayed less abundance  
213 compared to the wild-type TatB (Figure 3B). It is surprising that the Ad4 TatA and Bd4  
214 TatB, which have only 11 amino acids in the TMH, were still detected in the membrane  
215 fraction. Previous research (Behrendt and Brüser, 2014) showed that TatB and TatC  
216 tend to form a TatBC complex in a one to one stoichiometry in the resting state of the  
217 Tat translocon. To test whether the TatC contributes to the membrane stability of the  
218 TatB deletion group, TatC was knocked out in the Bd4 mutant (i.e., Bd4 $\Delta$ tatC). Even  
219 though a significant amount of Bd4 TatB was present in the membrane fraction when  
220 TatC was present, no Bd4 TatB was detected in the membrane of the Bd4 $\Delta$ tatC mutant  
221 (Figure 3C). This is clear evidence that TatC stabilizes TatB in the membrane such that  
222 TatB can be embedded when its TMH is too short to remain in the membrane on its  
223 own.

224

225 In summary, lengthening the TMHs of TatA and TatB did not significantly affect their  
226 membrane stability. Oppositely, even though Ad4 TatA and Bd4 TatB could still insert  
227 into the membrane, shortening the TMHs diminished the membrane stability of both  
228 TatA and TatB mutants. In addition, TatC, by forming a protein complex with TatB,

229 appears to assist the TatB mutants possessing shorter TMHs to stably embedded in the  
230 membrane.  
231

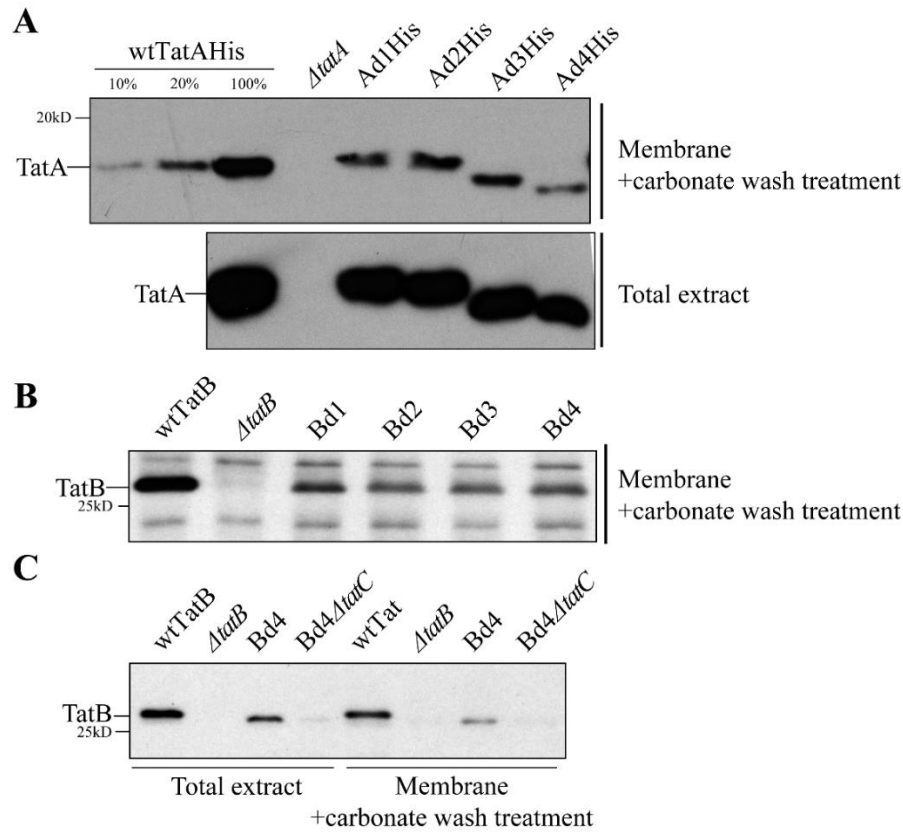

232

233 **Figure 3. Shortening the TatA and TatB TMH lengths results in lowered membrane**  
234 **stability.** (A) Assessment of membrane stability in TatA deletion mutants. Total cell extract of  
235 C-terminal 6X His-tagged wild-type TatA (wtTatA-His),  $\Delta$ tatA, and TatA deletion mutants (Ad1-  
236 4His) were subjected to fractionation. Membrane fractions (upper gel) were recovered from total  
237 cell extracts (lower gel) and washed with 100 mM Na<sub>2</sub>CO<sub>3</sub> to remove the portion of TatA which  
238 failed to stably embed in the membrane. Immunoblots using anti-His antibody are shown. Lanes  
239 1-3, serial dilution of membrane-embedded TatA in wild-type cells. (B) NaCO<sub>3</sub>-washed  
240 membrane fractions isolated from cell extracts of wtTatB,  $\Delta$ tatB, and TatB deletion mutants (Bd1-  
241 4). Immunoblot using anti-TatB antibody is shown. (C) Na<sub>2</sub>CO<sub>3</sub>- washed membrane fractions  
242 (right) isolated from cell extracts (left) of wtTatB,  $\Delta$ tatB, Bd4, and Bd4 in a TatC knockout strain  
243 (Bd4 $\Delta$ tatC). Immunoblot using anti-TatB antibody is shown.

244

245

246

247

|                   |       | Growth in the presence of SDS |                   | Growth in the presence of SDS |     |
|-------------------|-------|-------------------------------|-------------------|-------------------------------|-----|
| <b>Control</b>    | wtTat | +++                           | <i>AtatABC</i>    | -                             |     |
| <b>ANa group</b>  | ANa1  | +++                           | <b>BNa group</b>  | BNa1                          | +++ |
|                   | ANa2  | -                             |                   | BNa2                          | +++ |
|                   | ANa3  | -                             |                   | BNa3                          | +++ |
|                   | ANa4  | -                             |                   | BNa4                          | ++  |
|                   | ANa5  | -                             |                   | BNa5                          | +   |
| <b>A8Qa group</b> | A8Qa1 | +++                           | <b>B8Ea group</b> | B8Ea1                         | -   |
|                   | A8Qa2 | +++                           |                   | B8Ea2                         | -   |
|                   | A8Qa3 | +++                           |                   | B8Ea3                         | -   |
|                   | A8Qa4 | +++                           |                   | B8Ea4                         | -   |
|                   | A8Qa5 | -                             |                   | B8Ea5                         | -   |
| <b>ACa group</b>  | ACa1  | +++                           | <b>BCa group</b>  | BCa1                          | -   |
|                   | ACa2  | +++                           |                   | BCa2                          | -   |
|                   | ACa3  | ++                            |                   | BCa3                          | -   |
|                   | ACa4  | +++                           |                   | BCa4                          | -   |
|                   | ACa5  | -                             |                   | BCa5                          | -   |
| <b>Ad group</b>   | Ad1   | +++                           | <b>Bd group</b>   | Bd1                           | +   |
|                   | Ad2   | ++                            |                   | Bd2                           | ++  |
|                   | Ad3   | ++                            |                   | Bd3                           | -   |
|                   | Ad4   | -                             |                   | Bd4                           | +++ |

248 **Table 1. Summary of growth performance in the presence of SDS for TatA and TatB**  
 249 **mutants.** wtTat and *AtatABC* act as positive and negative controls, respectively. +++ , cells  
 250 exhibited higher than 50% survival percentage in 10% SDS; ++ , cells exhibited higher than 50%  
 251 survival percentage in 5% SDS; +, cells exhibited higher than 10% survival percentage in 5%  
 252 SDS; -, cells exhibited less than 10% survival percentage in 5% SDS. Survival ratios were  
 253 calculated as OD at 600 nm of cells grown for five hours in the presence of SDS to those grown in  
 254 the absence of SDS. Detailed survival rates in media with different concentrations of SDS are  
 255 shown in Supplemental Figure 2.

256

257 ***E. coli* TatA activity is diminished by lengthening or shortening the TatA TMH**

258 As a first pass at assessing the Tat activity of TatA TMH length mutants we examined  
 259 their growth profiles in SDS-containing media. Two native *E. coli* Tat substrates, AmiA  
 260 and AmiC, facilitate cell wall modelling, and a defect in transporting those substrates  
 261 results in sensitivity of the cell envelope to SDS in the media (Ize et al., 2003).  
 262 Accordingly, growth in SDS-containing media is a convenient indicator of whether

263 cells have at least a minimal Tat transport capability. Table 1 summarizes the survival  
264 ratio after 5 hours growth on SDS-containing LB media for our TMH length mutants;  
265 individual survival ratio curves are shown in Supplemental Figure 2. A number of  
266 notable points are seen in this table.

267

268 First, out of all the members of the ANa group, only ANa1 could grow in LB medium  
269 with 5% SDS and the rest lost their ability to grow with as low as 1% SDS  
270 (Supplemental Figure 2). In contrast, the A8Qa and ACa addition groups showed  
271 completely different behavior. Both A8Qa1-4 and ACa1-4 mutant groups were able to  
272 grow in LB medium with 5% SDS, while neither A8Qa5 nor ACa5 could survive in the  
273 same media. For the TatA deletion group, surprisingly, all the Ad mutants except the  
274 Ad4 could grow in LB medium with 5% SDS. Specifically, the Ad3 mutant, whose  
275 TMH only contains 12 amino acids, still retained the ability to grow in LB medium  
276 with 5% SDS.

277

278 While the SDS growth assay is convenient, it is not obvious how it scales with absolute  
279 Tat activity. To examine our mutants more quantitatively, we monitored the transport of  
280 a Tat substrate, SufI, to the periplasm 2.5 hours after induction with IPTG in the  
281 presence of TatA mutants in a TatBC background. This assay, while still essentially an  
282 end-point assay, has the potential to provide a more fine-grained view of Tat activity  
283 than the SDS growth assay. The results of this in vivo transport assay, shown in Figure  
284 4 as representative gels from two experiments, display many of the features observed  
285 in the SDS growth assay. For instance, ACa1, 2 and 4 mediated SufI transport (Figure  
286 4B) in addition to growth on SDS, as is the case also with the deletion mutants Ad1,  
287 Ad2, and Ad3 (Figure 4C). Neither ACa5 nor Ad4 showed SDS growth or SufI in  
288 vivo transport (Figure 4 B and C). However, it is clear that none of the mutants that  
289 could grow on SDS transported SufI as efficiently as did the wild-type TatA. As an  
290 example, see the A8Qa mutants in Figure 4A or any of the mutants in Figure 4B and C.

291 Thus, the *in vivo* SufI transport assay leads to the conclusion that either lengthening or  
292 shortening the TatA TMH results in loss of Tat transport efficiency, suggesting that there  
293 is a functional reason for its 15 amino acid length.

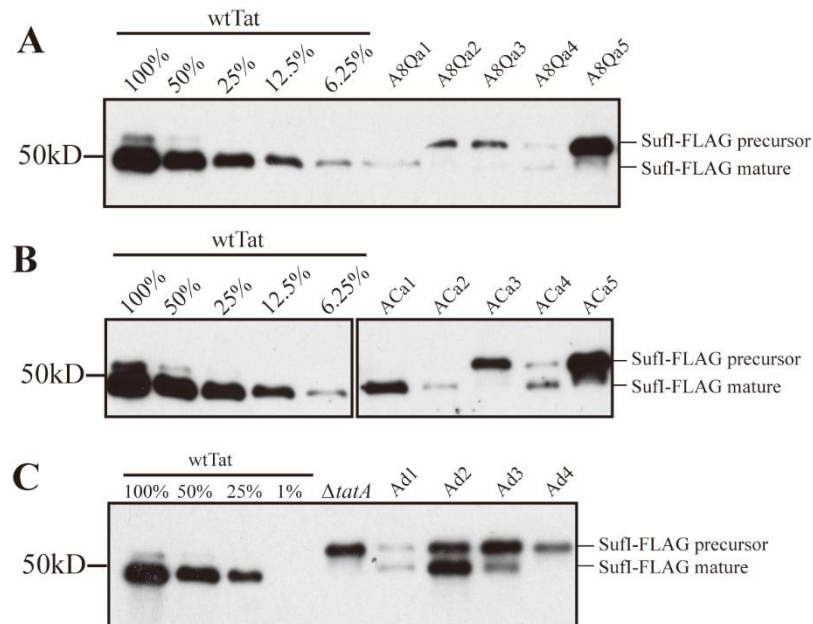

294

295 **Figure 4. *In vivo* transport of SufI in TatA TMH length mutants.** Periplasmic fractions were  
296 prepared from wild-type Tat (wtTat), TatA knockout mutant ( $\Delta tatA$ ), and TatA mutant cells  
297 transporting FLAG-tagged SufI (SufI-FLAG) 2.5 hours after induction with 1mM IPTG. The  
298 number of cells used in periplasmic extraction was normalized based on OD600, and immunoblots  
299 were developed using anti-FLAG antibody. Precursor and mature forms of SufI-FLAG are  
300 labeled. (A) transport of SufI-FLAG in the AQ8a group (AQ8a1-5); (B) transport of SufI in the  
301 TatA C-terminal addition group (ACa1-5); (C) transport of SufI-FLAG in the TatA deletion group  
302 (Ad1-4).

303

304 An even more fine-grained assessment of Tat transport activity is offered in pulse chase  
305 assays. Here, kinetics of transport can quantitatively indicate the true extent to which  
306 the TMH length mutants operate compared to the wild type. As seen in Figure 5B,  
307 whilst the wild-type TatA transported SufI with a rate constant of 0.094 min<sup>-1</sup>, the next  
308 best C-terminal addition mutant, ACa1, operated with a rate constant only 7% of that  
309 value. The best performing deletion mutant, Ad2, operated with a rate constant 41%  
310 of the wild type (Figure 5C). Here, when a true quantitative comparison of the TatA  
311 TMH length mutants are undertaken, it can again be concluded that the 15-residue wild  
312 type length appears to be tuned for optimal activity.

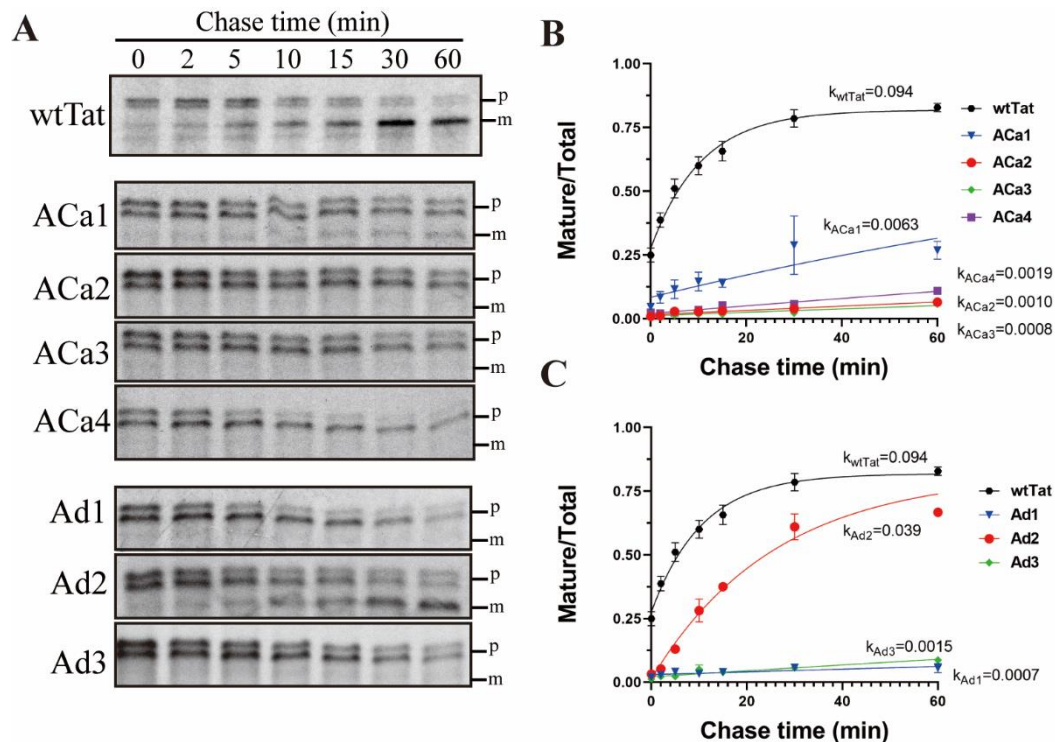

313

314 **Figure 5. Pulse-chase assays with TatA TMH length mutants.**

315 (A) SufI transport activity supported by TatA addition and deletion mutants (ACa1-4 and Ad1-3),  
316 as monitored by pulse-chase experiments. Autoradiograms developed from 8-16% acrylamide gels  
317 are shown; gels are representative of at least 2 biological replicates. p, precursor; m, mature SufI.

318 (B,C) Quantitation of the gels in panel A. The ordinate represents the ratio of intensities of the  
319 mature bands divided by the intensities of the mature + precursor bands. Data were fitted to a  
320 rising exponential model, and the corresponding first order rate constants are shown; units are  
321  $\text{min}^{-1}$ .

322

### 323 Overexpression of Ad3 and Ad4 blocks Tat transport

324 The majority of TatA is known to be recruited to the TatBC complex after the complex  
325 binds to the precursor signal peptide (Alcock et al., 2013; Dabney-Smith et al., 2006b,  
326 p. 4; Mori and Cline, 2002; Rose et al., 2013). Since the optimal number of TatA is  
327 reported to be ~20-fold higher than the TatB and TatC in the translocon (Celedon and  
328 Cline, 2012; Leake et al., 2008), insufficient TatA in the membrane is a possible reason  
329 for lowering of the overall transport rate when the TMH is shortened below 15 amino  
330 acids.

331

332 To determine if the lower abundance of the TatA in the Ad mutants caused the decrease

333 in the Tat activity, wild-type TatA, and the Ad1 – Ad4 TatA mutants were overexpressed  
334 on a separate plasmid which was induced by arabinose. Both the wtTatA, and the first  
335 three deletion mutants, Ad1, Ad2 and Ad3, and less so for Ad4, accumulated to higher  
336 levels after overexpression (Figure 6A). This resulted in transport of a slightly higher  
337 amount of SufI-FLAG to the periplasm in the wild type and the first two TatA deletion  
338 mutants, Ad1 and Ad2 (Figure 6A). In contrast, SufI-FLAG was not transported when  
339 the shortened TatA mutants Ad3 and Ad4 were induced by arabinose, even though they  
340 accumulated to levels exceeding or just below that of wtTatA, respectively. When a  
341 gradual increase of arabinose concentration was applied to induce increasing amounts  
342 of Ad3 TatA, the amount of mature SufI-FLAG was decreased in a dose-dependent  
343 manner, indicating that overexpressed Ad3 TatA blocked Tat transport (Figure 6B).  
344 Furthermore, when Ad3 and Ad4 TatA mutants were overexpressed in wild-type Tat  
345 background, they inhibited SufI-FLAG transport even in the presence of fully  
346 functional wtTatA (Figure 6C). These experiments demonstrate that while  
347 overexpressing Ad1 and Ad2 TatA could slightly improve the Tat transport activity,  
348 overexpressing Ad3 and Ad4 TatA exhibited a dominant negative-like effect. They also  
349 show that, the relative low abundance of Ad3 and Ad4 TatA in the membrane is not the  
350 reason for the low Tat activity, seen in Figure 3 and 4.



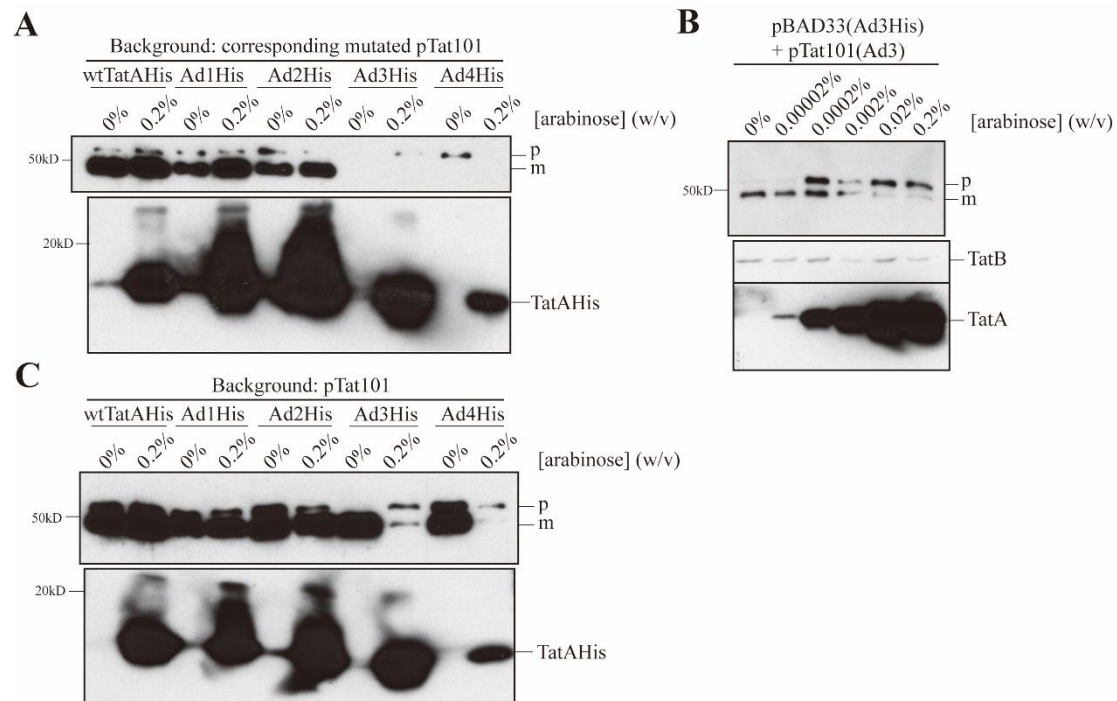

351

352 **Figure 6. Effect of overexpression of TMH-shortened TatA on SufI transport.** (A) *In vivo*  
 353 transport of SufI utilizing indicated mutants. Indicated cells were grown in the presence of  
 354 indicated [arabinose] for overexpression (from pBAD33) and with the same mutant constitutively  
 355 expressed as per prior experiments (from pTat101). When the cells reached OD<sub>600</sub> of 0.7  
 356 preSufI-FLAG was induced by addition of IPTG and then harvested and periplasm prepared  
 357 therefrom after an additional 2.5 hours. The number of cells used in the periplasm extraction was  
 358 normalized based on OD<sub>600</sub>. An immunoblot using anti-FLAG antibody is shown (upper gel).  
 359 Membrane fractions were isolated carbonate-washed, and samples were then subjected to  
 360 immunoblotting using the His antibody probing for TatA (lower gel). (B) The experiment of  
 361 panel A was performed with Ad3 only at the indicated arabinose concentrations, and the  
 362 immunoblot in the lower gel was additionally probes with anti-TatB as a loading control. (C)  
 363 The experiment of panel A was performed with wtTatA expressed as in previous experiments  
 364 from pTat101 whilst the indicated TatA TMH length mutants were overexpressed from pBAD33  
 365 (when arabinose was present). This experiment shows that overexpression of Ad3 and Ad4  
 366 block SufI transport in the presence of wtTatA. p, precursor; m, mature SufI-FLAG.

367

### 368 **TatA mutants with shortened TMHs compromise membrane integrity**

369 It has been previously demonstrated that the TatA TMH alone (without the APH) can  
 370 compromise membrane integrity in IMVs (Hou et al., 2018). In our study, we asked  
 371 whether a similar effect would be seen in *E. coli* inverted membrane vesicles (IMVs).  
 372 wtTatA, Ad TatA or A<sub>Ca</sub> TatA was overexpressed with either constitutively expressed  
 373 TatBC or in the DADE-Astrain (*Δtat*) background. Relative membrane abundance was

374 also tested by immunoblot (Supplemental Figure 3). Acridine orange was used to detect  
375 the  $\Delta$ pH across the IMVs membrane (Figure 7).

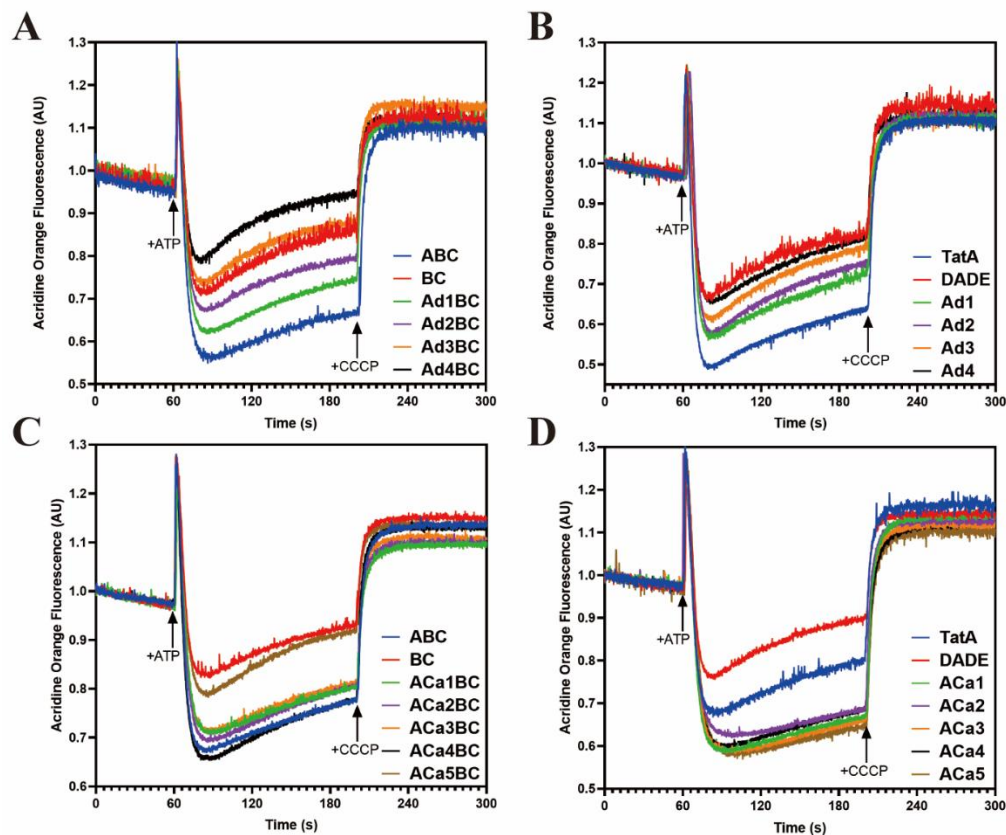

376  
377 **Figure 7. Shortened TatA TMH can cause membrane leakage.** The  $\Delta$ pH developed across  
378 IMVs was monitored by quenching of acridine orange. 4 mM ATP was added at 60 sec to  
379 generate the  $\Delta$ pH; 10  $\mu$ M CCCP was added at 200 sec to dissipate the  $\Delta$ pH, leading to  
380 fluorescence recovery. (A,C)  $\Delta$ pH in TatBC IMVs alone or with the corresponding TatA variants.  
381 (B, D)  $\Delta$ pH in DADE (complete Tat knock out) IMVs. AU, arbitrary units.

382

383 Figure 7A shows that the membranes developed a progressively lower pH gradient (less  
384 quenching of the fluorescence signal after adding ATP) when the TMH of TatA was  
385 progressively shortened. We interpret the lower  $\Delta$ pH to an increased proton leak. Ad4  
386 TatA caused the highest membrane leakage compared to wtTatA or no TatA when TatB  
387 and TatC were present in the IMV. However, no such effect was observed in TMH  
388 lengthened Aca group mutants (Figure 7C). Moreover, these effects were manifested  
389 both in the presence (Figure 7A, C) or absence (Figure 7B, D) of TatBC. The Ad4 TatA  
390 mutant displayed a similar membrane leakage effect as the no Tat strain. In contrast, the

391 ACa mutants, which possess longer TMHs than wtTatA, displayed much lower  
392 membrane leakage than the wtTatA (Figure 7D). Surprisingly, a significant proton leak  
393 was evident in the strains without any TatA (BC in Figure 7A, C) or in the complete  
394 absence of any Tat subunits (DADE in Figure 7B, D). We conclude from these  
395 experiments that shortening the TatA TMH resulted in a loss of membrane integrity,  
396 and that Ad4 TatA in the presence of TatBC caused the highest membrane leakage  
397 among all the mutants tested. Such result suggests that an induced general membrane  
398 instability explains why the shorter TMH TatA mutants exhibited lower transport rate  
399 than wtTatA in spite of their increased hydrophobic mismatch.

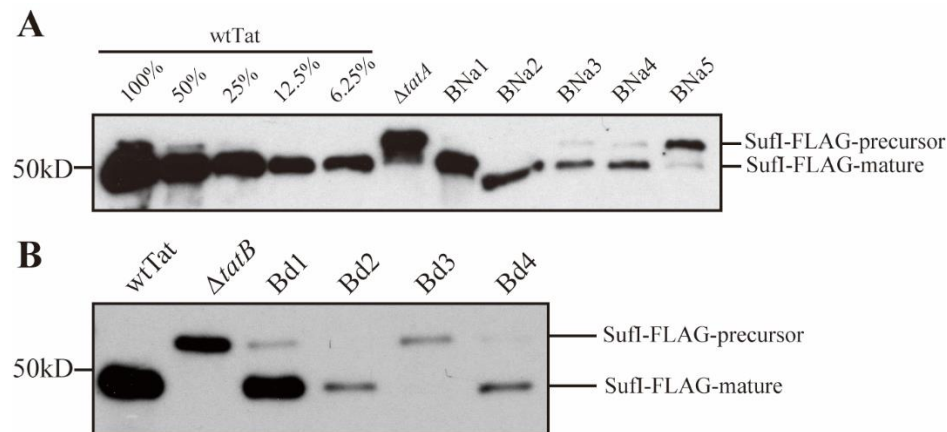

400

401 **Figure 8. In vivo transport assays with TatB mutants.** Experiments were performed essentially  
402 as in Figure 4 but substituting the TatB TMH length mutants that grew on SDS for the TatA  
403 mutants of that figure. (A) Transport of SufI-FLAG in the BNa TatB addition group. (B)  
404 Transport of SufI-FLAG in the Bd TatB deletion group.

405

#### 406 ***E. coli* TatB tolerates a wider range TMH lengths than does TatA**

407 As previously described, the SDS growth assay was conducted with the TatB mutants  
408 as well. For TatB addition group, the BNa mutants survived in LB medium with 5%  
409 SDS, although BNa5 displayed a lower survival ability compared to other BNa mutants  
410 (Table 1). Gradual decrease in Tat activity was nonetheless observed in both *in vivo*  
411 transport assays (Figure 8A) and pulse-chase experiment (Figure 9A, B). The BNa1,  
412 BNa2 and BNa3 mutants retained approximately 65%, 14% and 3.5% of the wild-type  
413 TatB transport rate, respectively. In contrast, none of B8Ea and BCa group mutants  
414 exhibited SDS tolerance, indicating that no Tat transport occurred in those mutants.

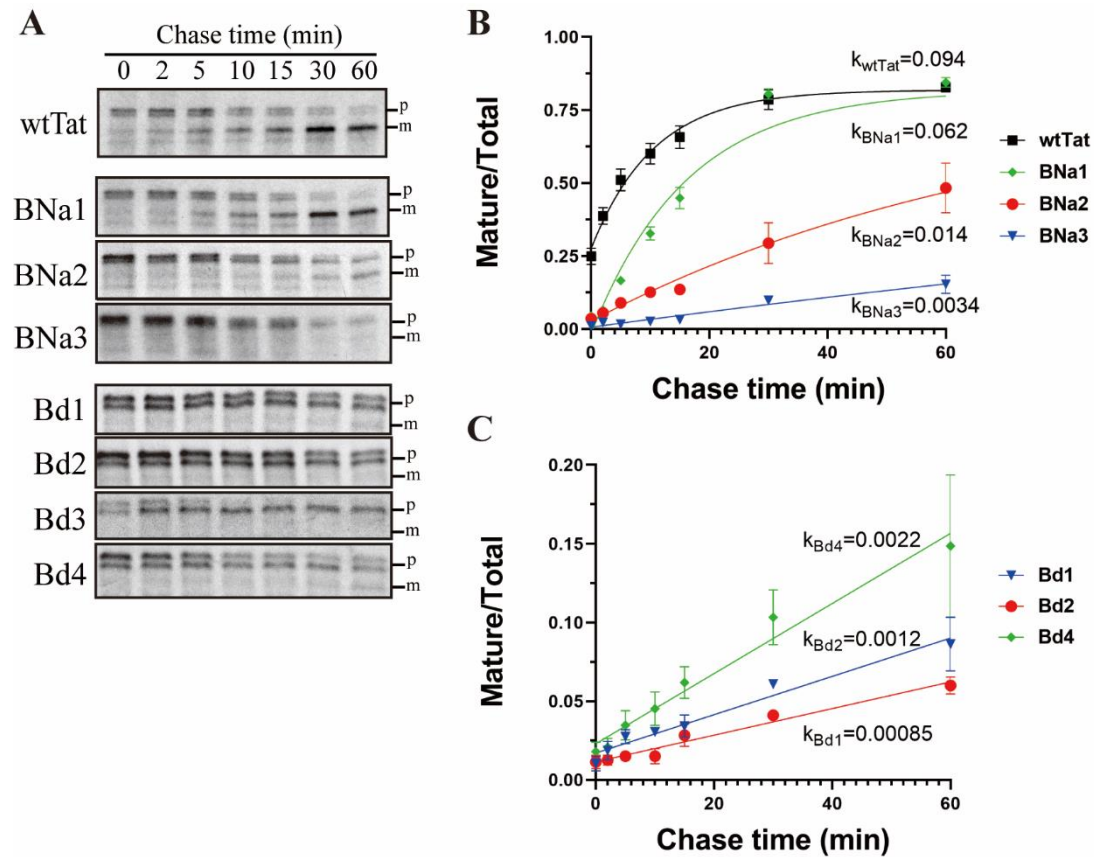

415

416 **Figure 9. Pulse-chase assays with TatB TMH length mutants.** Experiments were performed  
 417 essentially as in Figure 5 but substituting the TatB TMH length mutants that grew on SDS for the  
 418 TatA mutants of that figure. (A, B, C) SufI transport activity supported by TatB addition and  
 419 deletion mutants (BNa1-3 and Bd1-4), as monitored by pulse-chase experiments. Details as  
 420 described in the Figure 5 legend.

421

422 In contrast to the TatB addition mutants, a special pattern in the TatB deletion group  
 423 mutants in terms of SDS tolerance was identified. The Bd1, Bd2 and Bd4 mutants  
 424 retained sufficient Tat activity to grow in LB medium with 5% SDS, while the Bd3  
 425 mutant did not. However, pulse chase experiments with the Bd group indicated that  
 426 only approximately 1% transport activity was retained in the Bd1, Bd2 and Bd4 mutants  
 427 (Figure 9C). This speaks to the coarseness of the correlation between growth on SDS-  
 428 containing media and the absolute Tat activity (see Discussion).

429

430 To summarize, these results indicate an acceptable range from eleven to twenty amino  
 431 acids in the TatB TMH, which is wider than the range proposed from the TatA mutants.

432 As with TatA, a change in the length of the conserved hydrophobic region in the TatB  
433 TMH is not favored. Even though an overall longer TMH inhibits the TatB function, if  
434 the length of the hydrophobic region is preserved (i.e., adding residue from the N-  
435 terminus), its negative impact is not as severe when the length of the hydrophobic  
436 region is altered.

437

438

### **Discussion**

439 In this study, the effect of the hydrophobic mismatches in the Tat translocon was  
440 examined by modifying the length of the TMHs in *E. coli* TatA and TatB. Growth on  
441 SDS-containing media, and in vivo transport and pulse-chase assays were conducted  
442 to evaluate the Tat transport activity in the TMH length mutants comprehensively.

443 The results showed that while both TatA and TatB can tolerate some length  
444 modification in their respective TMHs, none of the modified mutants transported Tat  
445 substrates as well as the wild type strain. Interestingly, TatA and TatB exhibited  
446 different acceptable lengths of their TMHs, with TatA tolerating a TMH 11-19  
447 residues long and TatB tolerating a length between 10 and 20 residues. Further  
448 comparison of the transport rates between the addition and deletion mutants revealed  
449 different behaviors of the TatA and TatB TMH length mutants, perhaps reflecting their  
450 different roles in the Tat transport mechanism.

451

452 It is important to stress that TMHs both lengthened or shortened did not support  
453 protein transport as well as the wild type 15 amino length TMHs of both TatA and  
454 TatB. This, along with the observations that the 15-residue length of these TMHs is  
455 conserved (Figure 1 A,B), and moreover, this length is relatively rare in single-pass  
456 membrane proteins (Figure 2B), suggests that this particular hydrophobic mismatch is  
457 evolutionarily tuned for maximum activity. We are not the first to propose that this  
458 plays a role in the mechanism of Tat protein transport (Hou et al., 2018; Rodriguez et  
459 al., 2013).

460

461 One complicating issue in interpreting the fall off in activity of the TMH length  
462 mutants is the fact that amino acids in these TMHs interact with other residues, both  
463 in the same polypeptide and in TatC. Co-evolution analysis predicted as many as ten  
464 interactions between the TatA TMH residues and those on helices 5 and 6 in TatC  
465 (Alcock et al., 2016). Were we to add or delete additional amino acids directly into  
466 the middle of the TatA TMH, for instance, then we could expect to disrupt such  
467 interactions as positions of amino acids arrayed on the interacting face of the helix  
468 would have been altered. To minimize this potential complication, we added  
469 residues to the extreme N- and C-termini of the TMHs. Addition or deletion of  
470 residues from the C-terminus would be expected to keep the presentation face of the  
471 TMH intact, while possibly changing its orientation with respect to the APH. This is  
472 illustrated in Figure 10, which shows that in the wild type proteins the APHs of both  
473 TatA and TatB are displaced approximately 100 – 120 degrees from their respective  
474 polar amino acids. The importance of this relative displacement is not obvious, as  
475 growth on SDS-containing media cannot be predicted by proximity in the helical  
476 wheel projection of the APH to the polar amino acid. Nonetheless, amino acid  
477 additions at the extreme C-terminus would be expected to maintain the presenting  
478 face of the TMH, and in the case of the ACa mutants, all interacting residues should  
479 be intact and in position.

480

481 A less complex situation is expected when amino acids are added to the N-terminus of  
482 the TMH. In this instance, only the extreme N-terminus of the protein should rotate  
483 relative to the TMH, with the only potential contact disrupted being the 5<sup>th</sup> amino acid  
484 in either TatA (G5) or TatB (S5); all other residues are intact and in position. Since  
485 the N-terminal additions do not have the additional complication of displacement  
486 relative to the APH, we tend to weigh the information gleaned from the ANa and BNa  
487 mutants more heavily.

488

489 It is perhaps unexpected that the deletion mutants as short as 11 residues were still  
490 able to take up residence in the membranes and resist extraction by carbonate. The  
491 TatB Bd4 mutant loses its membrane location in the absence of TatC (Figure 3C),  
492 which points to a stabilizing interaction between the short TatB and TatC. However,  
493 the TatA Ad4 mutant appears to embed in the membrane on its own. This is  
494 demonstrated not only by their retention in the membranes after carbonate washing,  
495 but also by the dominant negative-like effect on SufI transport of Ada3 and Ada4  
496 overexpression in the presence of wild type TatA, and by their ability to cause proton  
497 leakage in IMVs.

498

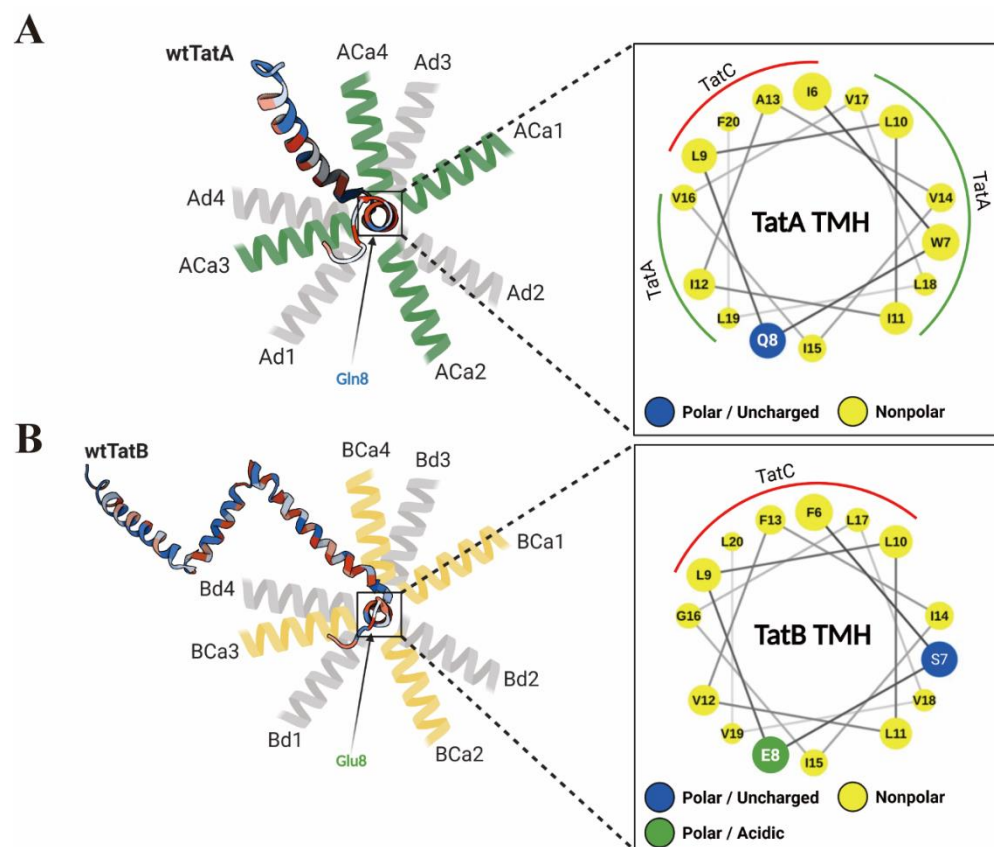

499

500 **Figure 10. Possible APH orientations change in TatA and TatB TMH mutants.** Predicted TatA  
501 (A) or TatB (B) APH orientations are illustrated from the top view. The projected structures of  
502 wtTatA (ID: 2MN7) and wtTatB (ID: 2MI2) showing the possible orientation of the APHs with  
503 respect to non-variant polar amino acid positions are shown on the left. On the right is shown a  
504 helical wheel projection (Mól et al., 2018) showing the potential Tat subunit interaction faces..

505

506 Our analyses of our TMH length mutants revealed an important technical point about  
507 assays for Tat activity. Given that the ANa mutants (except ANa1 mutant) were  
508 unable to grow in the presence of SDS, we were surprised that the ACa mutants could  
509 indeed grow on the same SDS-containing media. It was only when we performed  
510 kinetic assays that it became clear that the Tat activity in the ACa mutants was quite  
511 low. Even the best performing TatA C-terminal addition mutant, ACa1, transported  
512 SufI at only about 6% of that of the strain harboring wild type TatA (Figure 5B).  
513 Accordingly, the SDS-growth assay, which is an end point assay, does not scale  
514 linearly with Tat activity, and generally indicates only the complete loss of Tat  
515 function. Even ACa2, which transports SufI at 1% the rate of wild type showed wild  
516 type-like survivability on up to 10% SDS. Assays of Tat function by monitoring the  
517 presence of SufI in the periplasm are somewhat more sensitive to absolute Tat  
518 activity, but again, this is an end point assay that may underestimate the negative  
519 impact of an altered Tat machinery.

520

521 We were surprised to see the different effects of amino acid addition after the polar  
522 residues in TatA and TatB. While the amount of SufI found in the periplasm in the  
523 TatA A8Qa mutants was generally quite low (Figure 4A), they retained enough  
524 activity for growth in the presence of SDS. This contrasted the similar additions in  
525 TatB after the E8 residue, which apparently had no remaining Tat activity. This is  
526 just one example of many in which lengthening the TMH of TatA produced a different  
527 effect than a similar change in the length of the TMH of TatB. It is tempting to  
528 attribute this to a proposed fundamentally different function of these two proteins in  
529 the mechanism of Tat transport.

530

531 We also found that lengthening additions were sensitive to their location relative to  
532 the polar amino acids in these TMHs. In both TatA and TatB additions made at the  
533 extreme N-terminus of the TMH had different effects than those made just two



534 residues further into the helix, after the polar amino acids. Additions made after the  
535 7<sup>th</sup> amino acid, but just before the 8<sup>th</sup> polar residue had the same growth profile in  
536 SDS as the N-terminal additions (Supplemental Figure 2). The reason that the  
537 addition phenotypes switch around the polar residues remains to be elucidated, but  
538 possibilities include disruption of the helix interacting faces, and changes of the depth  
539 of the polar amino acids in the membrane.

540

541 How do these TMH length mutants inform us about the mechanism of protein  
542 transport on the Tat pathway? It is clear that changing the TMH lengths of either TatA  
543 or TatB from 15 residues in either direction results in a decline in overall Tat activity.  
544 One could argue that this decline in the TatB TMH mutants might be related to a loss  
545 of its ability to interact with TatC correctly, although the advantage conferred by  
546 making additions at the N-terminus of the TMH are still in effect. Still, since TatB  
547 and TatC form a stable complex with a 1:1 stoichiometry, it is difficult to attribute any  
548 function to TatB alone. TatA, on the other hand, has been studied on its own and has  
549 been shown to have interesting properties by itself (Alcock et al., 2013; Celler et al.,  
550 2013; Gohlke et al., 2005; Hauer et al., 2017; Hou et al., 2018; Zhang et al., 2014a).  
551 We interpret the detrimental effects of TatA TMH shortening and lengthening  
552 differently. We note that while the Ad2 deletion mutant has considerably better  
553 activity than any addition mutants (Figures 4C and 5B), which suggests that the  
554 increased hydrophobic mismatch confers some advantage, it still does not perform as  
555 well as the wild type. This decline in Tat activity when the TatA TMH is shortened  
556 could be attributed in part or in full to a loss of PMF driving force due to induced  
557 membrane leakage to protons. The Ad deletion mutants cause membrane leakage in  
558 a dose-dependent manner, in the presence or absence of the TatBC complex (Figure  
559 7).

560

561 The TatA TMH addition mutants also display poor Tat activity, although we believe

562 there is a different mechanism at work here. We favor the hypothesis that Tat protein  
563 transport occurs through transient toroidal pores that form in the membrane as a result  
564 of bilayer breakdown in response to localized membrane thinning (Asher and Theg,  
565 2021; Berks, 2015; Brüser and Sanders, 2003) . In this model, the hydrophobic  
566 mismatch set up by the Tat subunits confers a natural advantage toward membrane  
567 thinning, and this would be intensified by the binding of more TatA to the active  
568 machinery as the latter assembles on demand (Rollauer et al., 2012). Further,  
569 extrapolating the effect of the PMF on thinning of the thylakoid membrane (Johnson  
570 et al., 2011, 2011; Kirchhoff et al., 2011; Murakami and Packer, 1970) to the *E. coli*  
571 plasma membrane as well provides an immediate mechanism for coupling the PMF to  
572 Tat protein transport. Alterations in membrane thickness as a critical determinant of  
573 membrane protein function and/or assembly has recently been noted by others  
574 (Chen et al., 2017; He et al., 2020; Iadanza et al., 2020; Kreutzberger et al., 2019;  
575 Pleiner et al., 2020; Wu et al., 2020). In this context, one might expect that  
576 hydrophobic mismatch in the Tat translocation machinery would play a key role in Tat  
577 transport. Accordingly, the tuning of the TatA and TatB TMHs to 15 amino acids  
578 might be seen as an evolutionary compromise of selecting a hydrophobic mismatch  
579 that is not so severe as to cause detrimental ion leakage, but still sufficient to allow  
580 the membrane to thin enough under physiological conditions to the point of toroidal  
581 pore formation.  
582

583

## **Materials and Methods**

### **584 Strain and plasmid construction**

585 *E. coli* strain DADE-A (MC4100,  $\Delta$ tatABC,  $\Delta$ tatE, arabinose resistance) was used in  
586 both *in vivo* and *in vitro* experiments in this study (Wexler et al., 2000). For TatA and  
587 TatB variants in pTat101 (pTH19Kr derivative, a low copy plasmid constitutively  
588 expressing TatABC) (Kneuper et al., 2012), the indicated deletion and addition  
589 mutations were introduced by QuickChange site-directed mutagenesis (NEB, Q5 Site-  
590 Directed Mutagenesis Kit). For TatA variants in pBAD33 (a vector with arabinose-  
591 inducible araBAD operon) (Guzman et al., 1995), the appropriate *tatA* mutant alleles  
592 were amplified from the corresponding constructs in pTat101, which were then  
593 assembled into pBAD33 using the Gibson assembly approach (Gibson et al., 2009).  
594 The 6XHis tag was inserted into the indicated TatA constructs in pTat101 using the  
595 primers TatAhis\_F (5'-CACCACCACTAACACGTGTTTGATATCG-3') and  
596 TatAhis\_R (5'-ATGATGATGCACCTGCTCTTTATCGTG-3'). For TatA constructs  
597 in pBAD33, the *His<sub>6</sub>* tag was added using the primers pBAD33TatAhis\_F (5'-  
598 TCACCACCACTAATGGCTGTTTTGGCGG-3') and pBAD33TatAhis\_R (5'-  
599 TGATGATGACCCACCTGCTCTTTATCGTG-3'). For *in vivo* transport  
600 experiments, construct of pQE801 (SufI-FLAG) was produced as described (Huang  
601 and Palmer, 2017). For pulse-chase experiments, constructs pNR14 and pNR42 were  
602 as described previously (Sargent et al., 1999; Stanley et al., 2000a). All constructs  
603 were confirmed by Sanger sequencing. More detailed information about the plasmids  
604 used in this study can be found in Supplemental Table 1.

605

### **606 Sequence Alignments and Sequence Logo Plots**

607 122 TatA sequences and 60 TatB sequences were downloaded from GenBank (NCBI).  
608 Multiple sequence alignment for TatA and TatB, respectively, was performed using  
609 MUSCLE (Edgar, 2004). Sequence logos were subsequently generated using RStudio  
610 (Ver. 1.3.1073) with the ggseqlogo package (Wagih, 2017).

611

612

### 613 **Liquid SDS Growth Assay**

614 Overnight cultures grown at 37°C were normalized to an OD<sub>600</sub> of 0.1 before adding to  
615 the Luria-Bertani (LB) medium containing 0%, 1%, 2%, 5%, or 10% SDS, respectively,  
616 to a final optical density of 0.002. After 5 hours of shaking at 37°C, the optical density  
617 of the cell suspension at 600 nm was measured. Survival rates of the cells in the LB  
618 with corresponding SDS concentrations were calculated by taking the ratio of the  
619 optical density of cells grown in LB with indicated SDS concentration to cells grown  
620 in the LB without SDS.

621

### 622 **In vivo Transport Assay**

623 pTat101 variants were co-transformed with pQE801(SufI-FLAG) into the DADE-A  
624 strain. Cells were first grown overnight at 37°C, and were then diluted to an OD<sub>600</sub> of  
625 0.06 and cultured in 5 mL of fresh LB medium at 37°C with shaking for 3 hours. SufI-  
626 FLAG was induced by the addition of 1 mM IPTG (isopropyl β-D-1-  
627 thiogalactopyranoside). Following 2.5 hours of growth at 37°C, cells were harvested  
628 and subjected to fractionation. For TatA deletion mutants in pBAD33 variants, plasmids  
629 containing indicated mutated *tatA* alleles in pBAD33 were co-transformed with pQE801  
630 (SufI-FLAG), and pTat101 or the corresponding pTat101 variants. Overnight cultures  
631 were diluted and sub-cultured in 5 mL of fresh LB medium containing arabinose  
632 concentration ranging from 0% to 0.2%. At OD<sub>600</sub> ~ 0.6, cells were induced with 1  
633 mM IPTG. Following 2.5 hours of growth at 37°C, cells were harvested and subjected  
634 to fractionation.

635

### 636 **Cell Fractionation**

637 After *in vivo* transport, cells were harvested. The volume of cells in each mutant was  
638 normalized based on cell densities such that each sample contained 3 mL of cells with  
639 OD<sub>600</sub> = 1.5. Cells were centrifuged at 16,000 x g at room temperature. Cells were then  
640 cooled on ice and fractionated using the EDTA/lysozyme/cold osmotic shock method  
641 (Petiti et al., 2017) by applying 80 μL of 1X TES buffer (200 mM Tris-HCl, pH 8.0,  
642 0.5mM EDTA (ethylenediaminetetraacetic acid), 0.5 M sucrose), 3.2 μL of 10 mg/mL  
643 freshly prepared lysozyme solution, and 288 μL of 0.5X TES buffer (1X TES buffer  
644 diluted twice in water (v/v)), in order. Samples were then incubated at 4°C for 30 min  
645 before centrifugation at 5,000 x g for 5 min at 4°C. Supernatants were kept as the  
646 periplasmic fractions by adding equal volume of 2X SDS sample buffer and were

647 subjected to SDS-PAGE/Western-Blot analyses. For membrane extraction, pellets were  
648 then resuspended in 0.5X TES buffer containing 2 mM PMSF (phenylmethylsulphonyl  
649 fluoride), 2 mM MgCl<sub>2</sub>, and 10µg/mL DNase I, followed by 4 cycles of freezing and  
650 thawing in liquid nitrogen and centrifugation at 2,000 x g at 4°C. For carbonate washed  
651 samples, cells were washed in 10 mM Na<sub>2</sub>CO<sub>3</sub> for 1 hour followed by  
652 ultracentrifugation at 120,000 x g for 45 min at 4°C. Pellets were kept as the membrane  
653 fraction, which were then subjected to SDS-PAGE/Western-Blot analyses.

654

#### 655 **SDS-PAGE and Western-Blot**

656 Proteins were separated by SDS-PAGE followed by Western-Blot using anti-TatA, anti-  
657 TatB, anti-His tag (Genscript) or anti-FLAG (Invitrogen) antibodies, depending on the  
658 protein samples. *His*<sub>6</sub>, TatA and TatB were detected by HRP (horseradish peroxide)-  
659 conjugated anti-rabbit antibody and SufI-FLAG was detected using HRP-conjugated  
660 anti-mouse antibody. Proteins were then visualized using the ProSignal Pico ECL  
661 Western Blotting detection kit (Genesee Scientific).

662

#### 663 **Pulse-Chase Experiment and Autoradiography**

664 Experimental procedures were derived from (Stanley et al., 2000b). Overnight cultures  
665 carrying Tat variants in pTat101, pNR42 and pNR14 were grown in LB media at 30°C.  
666 100 µL of the overnight culture was then added in 3 mL of fresh LB media for sub-  
667 culture at 30°C. After 1.5 hours, cells were harvested and normalized such that each  
668 sample contained an equivalent of 0.5 mL cells with OD<sub>600</sub> = 0.2. Cells were then  
669 washed with 1X M9 medium (M9 salt, 0.1 mM CaCl<sub>2</sub>, 0.002% thiamine, 2 mM MgSO<sub>4</sub>,  
670 and a 0.01% 18-amino acid mix free of methionine and cysteine) to remove excess LB  
671 medium and resuspended in 2.5 mL M9 medium. Cells were grown for another hour at  
672 30°C. Subsequently, cells were grown at 42°C for 15 min to induce transcription of T7  
673 polymerase from pNR42. 400 µg/mL rifampicin were added to inhibit the *E. coli*  
674 endogenous RNA polymerase, followed by another 10 min of growth at 42°C. Cells  
675 were incubated for another 20 min at 30°C. Subsequently, cells were transferred to 37°C  
676 until the completion of the experiment. 0.025 mCi of [<sup>35</sup>S] methionine (PerkinElmer  
677 Inc. NEG772002MC) was added to 2.5 mL of culture to initiate the pulse process. After  
678 5 min of pulse, cells were chased by adding 750 µg/mL unlabeled cold methionine. A  
679 300 µL sample was taken at each time point, followed by immediate freezing in liquid  
680 nitrogen. Samples were then thawed on ice, centrifuged, and resuspended with 50 µl

681 2X SDS sample buffer, and then subjected to SDS-PAGE and autoradiography.  
682 Quantification of the protein bands were carried out using ImageJ software (Schneider  
683 et al., 2012).

684

### 685 **Statistical Analysis**

686 Data from the pulse-chase experiments were subjected to statistical analysis. An  
687 exponential plateau model,  $Y = Y_m - (Y_m - Y_0) * \exp(-k * x)$ , which is derived from the first-  
688 order reaction model, was used to fit the data using GraphPad Prism version 8.2.1 for  
689 Windows (GraphPad Software, San Diego, California USA) The ordinate value  
690 corresponds to the mature-to-total ratio for each sample, and the abscissa represents  
691 time in the pulse-chase experiment.  $Y_m$  was defined as the maximum value of the  
692 mature-to-total (i.e., mature to the sum of the mature and precursor), the first order rate  
693 constant,  $k$ , was obtained from the model, with the units of the reciprocal minutes..

694

### 695 **Statistical Analysis of Single-Pass Membrane Proteins**

696 A total number of 9232 single-pass membrane protein sequences from four categories  
697 (495 from *E. coli*, 5468 from proteobacteria, 2146 from chloroplasts, and 1397 from  
698 mitochondria) were downloaded from Swiss-Prot database (The UniProt Consortium,  
699 2021) by selecting single-pass proteins, followed by selecting the corresponding  
700 categories. The transmembrane domains of the proteins were then identified by using  
701 the TMHMM Server, v.2.0 (Möller et al., 2001). The output of the expected number  
702 of amino acids in the transmembrane helix (TMH) per protein was subsequently  
703 collected. The amino acid numbers predicted in the TMHs were rounded to the closest  
704 integer, and their relative frequency (i.e., ratio of occurrence to the total number of  
705 proteins in the indicated category) was plotted against the TMH length for each  
706 category using GraphPad Prism version 8.2.1.

707

### 708 **Proton leakage measurement**

709 Plasmids carrying wild-type or indicated TatA variants with the *His<sub>6</sub>* tag in pBAD33  
710 were co-transformed with or without TatA in pTat101 separately into DADE-A. IMV  
711 preparation was performed as described (Bageshwar and Musser, 2007). Acridine  
712 orange fluorescence-quenching assays were performed on a Fluorolog-3  
713 spectrofluorometer (HORIBA Scientific, model No. FL3-22). 50  $\mu$ l IMVs (final  
714  $A_{280}=0.375$ ) were added to a 2 ml reaction master mix containing 1X TE buffer (25 mM

715 MOPS, 25 mM MES, 5 mM MgCl<sub>2</sub>, 50 mM KCl, 200 mM sucrose and 57 µg/ml BSA,  
716 pH = 7.0), 2.9 mM phosphocreatine, 0.29 mg/ml creatine kinase, and 2 µM acridine  
717 orange. The reaction mix was kept on ice before the measurement. Before the  
718 measurement, the mixture was first incubated in a 3 ml cuvette at 37°C for 5 min with  
719 slow stirring for temperature equilibration. Acridine orange fluorescence was  
720 recorded at  $\lambda_{\text{ex}} = 494$  nm (slit = 1 nm) and  $\lambda_{\text{em}} = 540$  nm (slit = 5 nm) every 1/10 second.  
721 20 µl of 400 mM ATP (4 mM final concentration) was added into the cuvette at 60  
722 seconds, and 4 ul of 5 mM CCCP (10 µM final concentration) was added to the cuvette  
723 to dissipate the proton gradient at 200 seconds.

724

725

726

### **Acknowledgements**

727 We would like to thank Tracy Palmer and Jon Cherry for their generous gifts of  
728 materials, as well as for their comments and discussions on this project. We also  
729 thank Ben Berks and Thomas Brūser for their many insightful comments on this  
730 work. We gratefully acknowledge support from the Division of Chemical Sciences,  
731 Geosciences, and Biosciences, Office of Basic Energy Sciences of the U.S.  
732 Department of Energy through Grant DE-SC0020304 to SMT.

733

734

### **Competing interests**

735 The authors have no competing interests to declare.

736

737

738

## References

- 739 Alcock F, Baker MAB, Greene NP, Palmer T, Wallace MI, Berks BC. 2013. Live cell  
740 imaging shows reversible assembly of the TatA component of the twin-arginine  
741 protein transport system. *Proc Natl Acad Sci* **110**:E3650–E3659.  
742 doi:10.1073/pnas.1306738110
- 743 Alcock F, Stansfeld PJ, Basit H, Habersetzer J, Baker MA, Palmer T, Wallace MI, Berks  
744 BC. 2016. Assembling the Tat protein translocase. *eLife* **5**:e20718.  
745 doi:10.7554/eLife.20718
- 746 Asher AH, Theg SM. 2021. Electrochromic shift supports the membrane destabilization  
747 model of Tat-mediated transport and shows ion leakage during Sec transport.  
748 *Proc Natl Acad Sci U S A* **118**. doi:10.1073/pnas.2018122118
- 749 Bageshwar UK, Musser SM. 2007. Two electrical potential–dependent steps are  
750 required for transport by the Escherichia coli Tat machinery. *J Cell Biol* **179**:87–  
751 99. doi:10.1083/jcb.200702082
- 752 Barrett CML, Mathers JE, Robinson C. 2003. Identification of key regions within the  
753 Escherichia coli TatAB subunits. *FEBS Lett* **537**:42–46. doi:10.1016/S0014-  
754 5793(03)00068-1
- 755 Behrendt J, Brüser T. 2014. The TatBC Complex of the Tat Protein Translocase in  
756 Escherichia coli and Its Transition to the Substrate-Bound TatABC Complex.  
757 *Biochemistry* **53**:2344–2354. doi:10.1021/bi500169s
- 758 Berks BC. 2015. The Twin-Arginine Protein Translocation Pathway. *Annu Rev Biochem*  
759 **84**:843–864. doi:10.1146/annurev-biochem-060614-034251
- 760 Brandizzi F, Frangne N, Marc-Martin S, Hawes C, Neuhaus J-M, Paris N. 2002. The  
761 Destination for Single-Pass Membrane Proteins Is Influenced Markedly by the  
762 Length of the Hydrophobic Domain. *Plant Cell* **14**:1077–1092.  
763 doi:10.1105/tpc.000620
- 764 Braun NA, Davis AW, Theg SM. 2007. The Chloroplast Tat Pathway Utilizes the  
765 Transmembrane Electric Potential as an Energy Source. *Biophys J* **93**:1993–  
766 1998. doi:10.1529/biophysj.106.098731
- 767 Brüser T, Sanders C. 2003. An alternative model of the twin arginine translocation  
768 system. *Microbiol Res* **158**:7–17. doi:10.1078/0944-5013-00176
- 769 Cledon JM, Cline K. 2012. Stoichiometry for binding and transport by the twin  
770 arginine translocation system. *J Cell Biol* **197**:523–534.  
771 doi:10.1083/jcb.201201096
- 772 Celler K, van Wezel GP, Willemse J. 2013. Single particle tracking of dynamically  
773 localizing TatA complexes in Streptomyces coelicolor. *Biochem Biophys Res*  
774 *Commun* **438**:38–42. doi:10.1016/j.bbrc.2013.07.016
- 775 Chen Y, Capponi S, Zhu L, Gellenbeck P, Freites JA, White SH, Dalbey RE. 2017. YidC  
776 Insertase of Escherichia coli: Water Accessibility and Membrane Shaping.  
777 *Structure* **25**:1403-1414.e3. doi:10.1016/j.str.2017.07.008
- 778 Clark SA, Theg SM. 1997. A folded protein can be transported across the chloroplast  
779 envelope and thylakoid membranes. *Mol Biol Cell* **8**:923–934.



- 780           doi:10.1091/mbc.8.5.923
- 781 Dabney-Smith C, Mori H, Cline K. 2006a. Oligomers of Tha4 Organize at the  
782           Thylakoid Tat Translocase during Protein Transport. *J Biol Chem* **281**:5476–  
783           5483. doi:10.1074/jbc.M512453200
- 784 Dabney-Smith C, Mori H, Cline K. 2006b. Oligomers of Tha4 Organize at the  
785           Thylakoid Tat Translocase during Protein Transport. *J Biol Chem* **281**:5476–  
786           5483. doi:10.1074/jbc.M512453200
- 787 Edgar RC. 2004. MUSCLE: a multiple sequence alignment method with reduced time  
788           and space complexity. *BMC Bioinformatics* **5**:113. doi:10.1186/1471-2105-5-  
789           113
- 790 Gérard F, Cline K. 2007. The Thylakoid Proton Gradient Promotes an Advanced Stage  
791           of Signal Peptide Binding Deep within the Tat Pathway Receptor Complex. *J*  
792           *Biol Chem* **282**:5263–5272. doi:10.1074/jbc.M610337200
- 793 Gibson DG, Young L, Chuang R-Y, Venter JC, Hutchison CA, Smith HO. 2009.  
794           Enzymatic assembly of DNA molecules up to several hundred kilobases. *Nat*  
795           *Methods* **6**:343–345. doi:10.1038/nmeth.1318
- 796 Gohlke U, Pullan L, McDevitt CA, Porcelli I, Leeuw E de, Palmer T, Saibil HR, Berks  
797           BC. 2005. The TatA component of the twin-arginine protein transport system  
798           forms channel complexes of variable diameter. *Proc Natl Acad Sci* **102**:10482–  
799           10486. doi:10.1073/pnas.0503558102
- 800 Guzman LM, Belin D, Carson MJ, Beckwith J. 1995. Tight regulation, modulation, and  
801           high-level expression by vectors containing the arabinose PBAD promoter. *J*  
802           *Bacteriol* **177**:4121–4130. doi:10.1128/jb.177.14.4121-4130.1995
- 803 Habersetzer Johann, Moore Kristoffer, Cherry Jon, Buchanan Grant, Stansfeld Phillip  
804           J., Palmer Tracy. 2017. Substrate-triggered position switching of TatA and TatB  
805           during Tat transport in *Escherichia coli*. *Open Biol* **7**:170091.  
806           doi:10.1098/rsob.170091
- 807 Hauer RS, Freudl R, Dittmar J, Jakob M, Klösgen RB. 2017. How to achieve Tat  
808           transport with alien TatA. *Sci Rep* **7**:1–13. doi:10.1038/s41598-017-08818-w
- 809 He Y, Xu J, Wu X, Li L. 2020. Structures of a P4-ATPase lipid flippase in lipid bilayers.  
810           *Protein Cell* **11**:458–463. doi:10.1007/s13238-020-00712-y
- 811 Hou B, Heidrich ES, Mehner-Breitfeld D, Brüser T. 2018. The TatA component of the  
812           twin-arginine translocation system locally weakens the cytoplasmic membrane  
813           of *Escherichia coli* upon protein substrate binding. *J Biol Chem* **293**:7592–7605.  
814           doi:10.1074/jbc.RA118.002205
- 815 Hu Y, Zhao E, Li H, Xia B, Jin C. 2010. Solution NMR Structure of the TatA  
816           Component of the Twin-Arginine Protein Transport System from Gram-Positive  
817           Bacterium *Bacillus subtilis*. *J Am Chem Soc* **132**:15942–15944.  
818           doi:10.1021/ja1053785
- 819 Huang Q, Palmer T. 2017. Signal Peptide Hydrophobicity Modulates Interaction with  
820           the Twin-Arginine Translocase. *mBio* **8**:e00909-17. doi:10.1128/mBio.00909-  
821           17

- 822 Iadanza MG, Schiffrin B, White P, Watson MA, Horne JE, Higgins AJ, Calabrese AN,  
823 Brockwell DJ, Tuma R, Kalli AC, Radford SE, Ranson NA. 2020. Distortion of  
824 the bilayer and dynamics of the BAM complex in lipid nanodiscs. *Commun Biol*  
825 **3**:1–14. doi:10.1038/s42003-020-01419-w
- 826 Ize B, Stanley NR, Buchanan G, Palmer T. 2003. Role of the Escherichia coli Tat  
827 pathway in outer membrane integrity. *Mol Microbiol* **48**:1183–1193.  
828 doi:10.1046/j.1365-2958.2003.03504.x
- 829 Johnson MP, Goral TK, Duffey CDP, Brain APR, Mullineaux CW, Ruban AV. 2011.  
830 Photoprotective Energy Dissipation Involves the Reorganization of  
831 Photosystem II Light-Harvesting Complexes in the Grana Membranes of  
832 Spinach Chloroplasts. *Plant Cell* **23**:1468–1479. doi:10.1105/tpc.110.081646
- 833 Killian JA. 1998. Hydrophobic mismatch between proteins and lipids in membranes.  
834 *Biochim Biophys Acta BBA - Rev Biomembr* **1376**:401–416.  
835 doi:10.1016/S0304-4157(98)00017-3
- 836 Kirchoff H, Hall C, Wood M, Herbstová M, Tsabari O, Nevo R, Charuvi D, Shimoni  
837 E, Reich Z. 2011. Dynamic control of protein diffusion within the granal  
838 thylakoid lumen. *Proc Natl Acad Sci* **108**:20248–20253.  
839 doi:10.1073/pnas.1104141109
- 840 Kneuper H, Maldonado B, Jäger F, Krehenbrink M, Buchanan G, Keller R, Müller M,  
841 Berks BC, Palmer T. 2012. Molecular dissection of TatC defines critical regions  
842 essential for protein transport and a TatB–TatC contact site. *Mol Microbiol*  
843 **85**:945–961. doi:10.1111/j.1365-2958.2012.08151.x
- 844 Kreutzberger AJB, Ji M, Aaron J, Mihaljević L, Urban S. 2019. Rhomboid distorts  
845 lipids to break the viscosity-imposed speed limit of membrane diffusion.  
846 *Science* **363**. doi:10.1126/science.aao0076
- 847 Leake MC, Greene NP, Godun RM, Granjon T, Buchanan G, Chen S, Berry RM, Palmer  
848 T, Berks BC. 2008. Variable stoichiometry of the TatA component of the twin-  
849 arginine protein transport system observed by in vivo single-molecule imaging.  
850 *Proc Natl Acad Sci* **105**:15376–15381. doi:10.1073/pnas.0806338105
- 851 Milovanovic D, Honigmann A, Koike S, Göttfert F, Pähler G, Junius M, Müller S,  
852 Diederichsen U, Janshoff A, Grubmüller H, Risselada HJ, Eggeling C, Hell SW,  
853 van den Bogaart G, Jahn R. 2015. Hydrophobic mismatch sorts SNARE  
854 proteins into distinct membrane domains. *Nat Commun* **6**:5984.  
855 doi:10.1038/ncomms6984
- 856 Mitra K, Ubarretxena-Belandia I, Taguchi T, Warren G, Engelman DM. 2004.  
857 Modulation of the bilayer thickness of exocytic pathway membranes by  
858 membrane proteins rather than cholesterol. *Proc Natl Acad Sci* **101**:4083–4088.  
859 doi:10.1073/pnas.0307332101
- 860 Mól AR, Castro MS, Fontes W. 2018. NetWheels: A web application to create high  
861 quality peptide helical wheel and net projections. *bioRxiv* 416347.  
862 doi:10.1101/416347
- 863 Möller S, Croning MD, Apweiler R. 2001. Evaluation of methods for the prediction of

- 864 membrane spanning regions. *Bioinforma Oxf Engl* **17**:646–653.  
865 doi:10.1093/bioinformatics/17.7.646
- 866 Mori H, Cline K. 2002. A twin arginine signal peptide and the pH gradient trigger  
867 reversible assembly of the thylakoid  $\Delta$ pH/Tat translocase. *J Cell Biol* **157**:205–  
868 210. doi:10.1083/jcb.200202048
- 869 Murakami S, Packer L. 1970. Light-induced Changes in the Conformation and  
870 Configuration of the Thylakoid Membrane of *Ulva* and *Porphyra* Chloroplasts  
871 in Vivo. *Plant Physiol* **45**:289–299. doi:10.1104/pp.45.3.289
- 872 New CP, Ma Q, Dabney-Smith C. 2018. Routing of thylakoid lumen proteins by the  
873 chloroplast twin arginine transport pathway. *Photosynth Res* **138**:289–301.  
874 doi:10.1007/s11120-018-0567-z
- 875 Palmer T, Berks BC. 2012. The twin-arginine translocation (Tat) protein export pathway.  
876 *Nat Rev Microbiol* **10**:483–496. doi:10.1038/nrmicro2814
- 877 Palmer T, Sargent F, Berks BC. 2005. Export of complex cofactor-containing proteins  
878 by the bacterial Tat pathway. *Trends Microbiol* **13**:175–180.  
879 doi:10.1016/j.tim.2005.02.002
- 880 Parton DL, Klingelhoefer JW, Sansom MSP. 2011. Aggregation of Model Membrane  
881 Proteins, Modulated by Hydrophobic Mismatch, Membrane Curvature, and  
882 Protein Class. *Biophys J* **101**:691–699. doi:10.1016/j.bpj.2011.06.048
- 883 Perkins G, Renken C, Martone ME, Young SJ, Ellisman M, Frey T. 1997. Electron  
884 Tomography of Neuronal Mitochondria: Three-Dimensional Structure and  
885 Organization of Cristae and Membrane Contacts. *J Struct Biol* **119**:260–272.  
886 doi:10.1006/jsbi.1997.3885
- 887 Petiti M, Houot L, Duché D. 2017. Cell Fractionation In: Journet L, Cascales E, editors.  
888 Bacterial Protein Secretion Systems: Methods and Protocols, Methods in  
889 Molecular Biology. New York, NY: Springer New York. pp. 59–64.  
890 doi:10.1007/978-1-4939-7033-9\_3
- 891 Pleiner T, Tomaleri GP, Januszyk K, Inglis AJ, Hazu M, Voorhees RM. 2020. Structural  
892 basis for membrane insertion by the human ER membrane protein complex.  
893 *Science* **369**:433–436. doi:10.1126/science.abb5008
- 894 Pribil M, Labs M, Leister D. 2014. Structure and dynamics of thylakoids in land plants.  
895 *J Exp Bot* **65**:1955–1972. doi:10.1093/jxb/eru090
- 896 Rodriguez F, Rouse SL, Tait CE, Harmer J, Riso AD, Timmel CR, Sansom MSP, Berks  
897 BC, Schnell JR. 2013. Structural model for the protein-translocating element of  
898 the twin-arginine transport system. *Proc Natl Acad Sci* **110**:E1092–E1101.  
899 doi:10.1073/pnas.1219486110
- 900 Rollauer SE, Tarry MJ, Graham JE, Jääskeläinen M, Jäger F, Johnson S, Krehenbrink  
901 M, Liu S-M, Lukey MJ, Marcoux J, McDowell MA, Rodriguez F, Roversi P,  
902 Stansfeld PJ, Robinson CV, Sansom MSP, Palmer T, Högbom M, Berks BC, Lea  
903 SM. 2012. Structure of the TatC core of the twin-arginine protein transport  
904 system. *Nature* **492**:210–214. doi:10.1038/nature11683
- 905 Rose P, Fröbel J, Graumann PL, Müller M. 2013. Substrate-Dependent Assembly of the

- 906 Tat Translocase as Observed in Live Escherichia coli Cells. *PLOS ONE*  
907 **8**:e69488. doi:10.1371/journal.pone.0069488
- 908 Sargent F, Stanley NR, Berks BC, Palmer T. 1999. Sec-independent Protein  
909 Translocation in Escherichia coli. *J Biol Chem* **274**:36073–36082.  
910 doi:10.1074/jbc.274.51.36073
- 911 Schneider CA, Rasband WS, Eliceiri KW. 2012. NIH Image to ImageJ: 25 years of  
912 image analysis. *Nat Methods* **9**:671–675. doi:10.1038/nmeth.2089
- 913 Stanley NR, Palmer T, Berks BC. 2000a. The twin arginine consensus motif of Tat  
914 signal peptides is involved in Sec-independent protein targeting in Escherichia  
915 coli. *J Biol Chem* **275**:11591–11596. doi:10.1074/jbc.275.16.11591
- 916 Stanley NR, Palmer T, Berks BC. 2000b. The Twin Arginine Consensus Motif of Tat  
917 Signal Peptides Is Involved in Sec-independent Protein Targeting in Escherichia  
918 coli \*. *J Biol Chem* **275**:11591–11596. doi:10.1074/jbc.275.16.11591
- 919 Taubert J, Hou B, Risselada HJ, Mehner D, Lünsdorf H, Grubmüller H, Brüser T. 2015.  
920 TatBC-Independent TatA/Tat Substrate Interactions Contribute to Transport  
921 Efficiency. *PLOS ONE* **10**:e0119761. doi:10.1371/journal.pone.0119761
- 922 Teter SA, Theg SM. 1998. Energy-transducing thylakoid membranes remain highly  
923 impermeable to ions during protein translocation. *Proc Natl Acad Sci* **95**:1590–  
924 1594. doi:10.1073/pnas.95.4.1590
- 925 The UniProt Consortium. 2021. UniProt: the universal protein knowledgebase in 2021.  
926 *Nucleic Acids Res* **49**:D480–D489. doi:10.1093/nar/gkaa1100
- 927 Tsirigotaki A, De Geyter J, Šoštaric' N, Economou A, Karamanou S. 2017. Protein  
928 export through the bacterial Sec pathway. *Nat Rev Microbiol* **15**:21–36.  
929 doi:10.1038/nrmicro.2016.161
- 930 Wagih O. 2017. ggseqlogo: a versatile R package for drawing sequence logos.  
931 *Bioinformatics* **33**:3645–3647. doi:10.1093/bioinformatics/btx469
- 932 Wexler M, Sargent F, Jack RL, Stanley NR, Bogsch EG, Robinson C, Berks BC, Palmer  
933 T. 2000. TatD Is a Cytoplasmic Protein with DNase Activity NO  
934 REQUIREMENT FOR TatD FAMILY PROTEINS IN Sec-INDEPENDENT  
935 PROTEIN EXPORT. *J Biol Chem* **275**:16717–16722.  
936 doi:10.1074/jbc.M000800200
- 937 Wu X, Siggel M, Ovchinnikov S, Mi W, Svetlov V, Nudler E, Liao M, Hummer G,  
938 Rapoport TA. 2020. Structural basis of ER-associated protein degradation  
939 mediated by the Hrd1 ubiquitin ligase complex. *Science* **368**:eaaz2449.  
940 doi:10.1126/science.aaz2449
- 941 Zhang Y, Hu Y, Li H, Jin C. 2014a. Structural Basis for TatA Oligomerization: An NMR  
942 Study of Escherichia coli TatA Dimeric Structure. *PLOS ONE* **9**:e103157.  
943 doi:10.1371/journal.pone.0103157
- 944 Zhang Y, Wang L, Hu Y, Jin C. 2014b. Solution structure of the TatB component of the  
945 twin-arginine translocation system. *Biochim Biophys Acta BBA - Biomembr*  
946 **1838**:1881–1888. doi:10.1016/j.bbamem.2014.03.015  
947  
948

949  
950  
951  
952

### Supplemental information

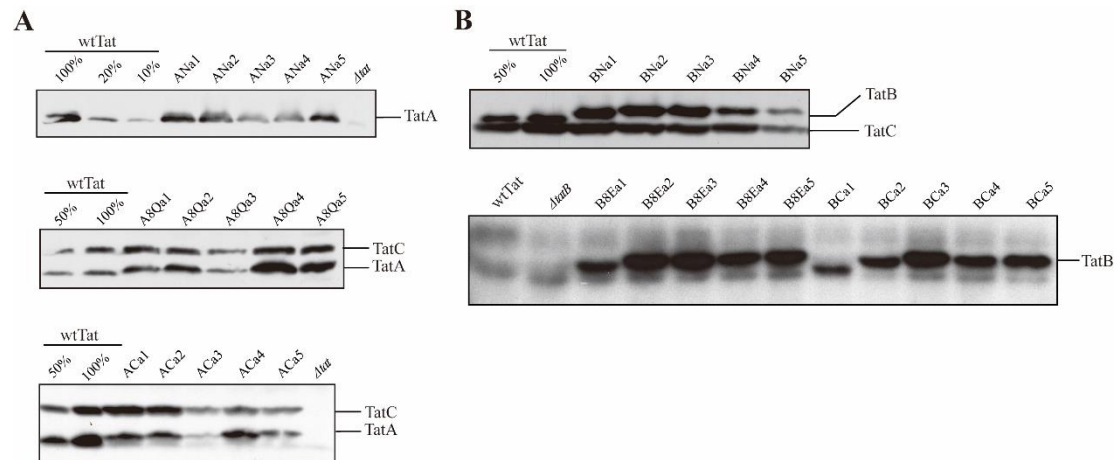

953  
954  
955  
956  
957  
958  
959  
960  
961  
962

**Supplemental Figure 1. Membrane stability of TatA and TatB in the corresponding addition mutants.** (A) Assessment of membrane stability in TatA addition mutants. Shown are immunoblots of carbonate-treated membrane fractions from extracts of wild-type Tat (wtTat),  $\Delta tatA$ , and TatA addition mutants lengthened at three different locations (ANa1-5, AQA1-5, and ACA1-5) developed with anti-TatA antibody, without (upper) or with anti-TatC antibody (lower). (B) Shown are immunoblots of carbonate-treated membrane fractions from extracts of wild-type Tat (wtTat),  $\Delta tatB$ , and TatB addition mutants lengthened at three locations (BNa1-5, BEa105, and BCa1-5) developed with anti-TatB antibody with (upper) and without (lower) anti-TatC antibody.

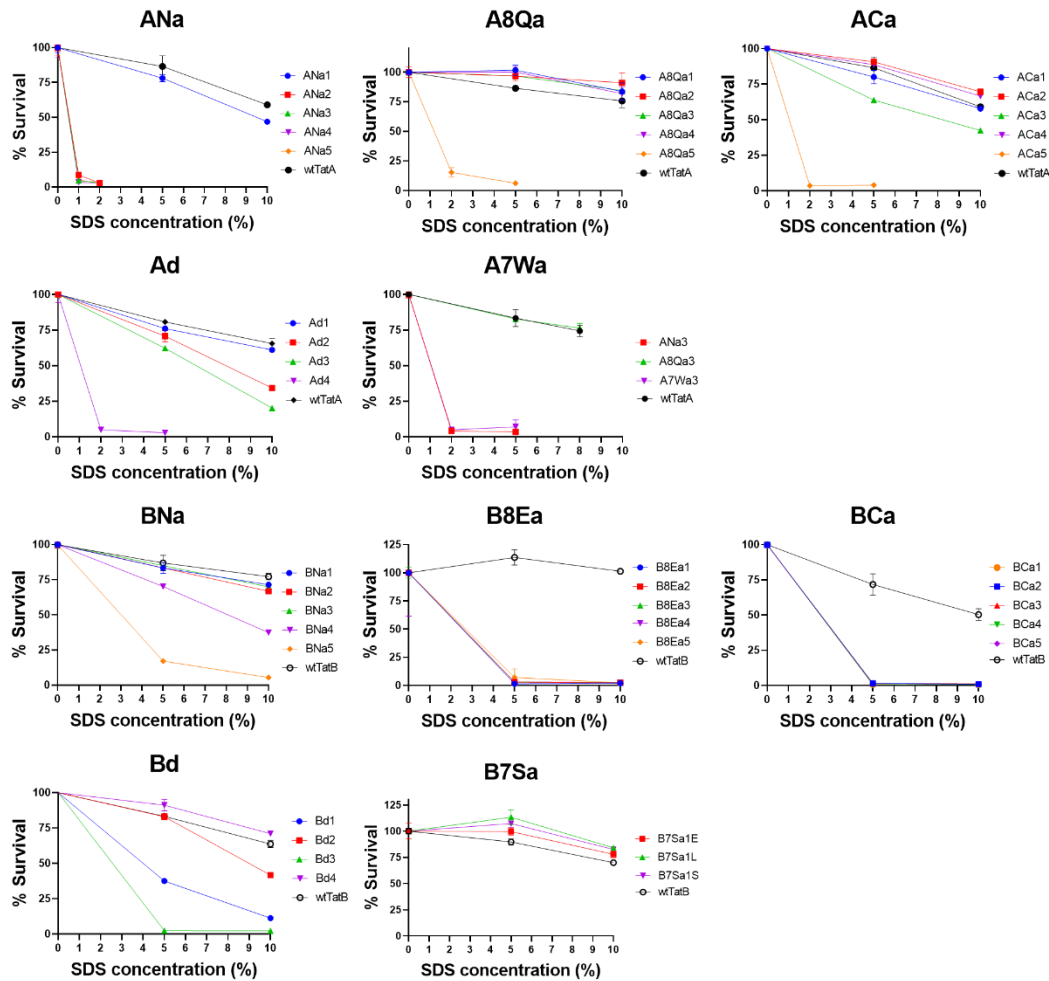

963  
964  
965  
966  
967  
968

**Supplemental Figure 2. Growth performance of the TatA and TatB TMH length mutants in the presence of SDS.** wtTatA and wtTatB act as the positive controls. Survival ratios, displayed in percentages, were obtained by computing the ratio of the optical density of the cells grown for five hours in the indicated SDS concentration to the cells grown without SDS.

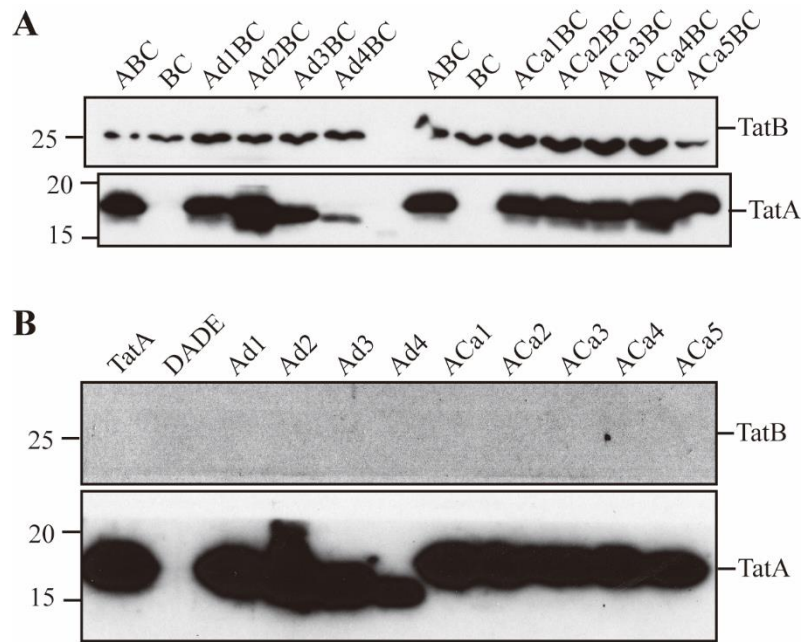

969

970 **Supplemental Figure 3. Confirmation of the expression of mutated TatA in TatBC IMVs and**

971 **DADE IMVs.** (A) TatBC IMVs or (B) DADE IMVs alone or with the corresponding His-tagged

972 TatA variants were subjected to immunoblotting using anti-His antibody probing for TatA. TatB,

973 which was detected by TatB antibody, served as a loading control for this experiment.

974

975

**Supplemental Table 1. Plasmid information and mutants.**

| <b>Plasmid Name</b> | <b>Description</b>                                                             | <b>Source</b>           |
|---------------------|--------------------------------------------------------------------------------|-------------------------|
| pBAD33              | Expression vector with arabinose-inducible <i>araBAD</i> operon                | (Guzman et al., 1995)   |
| pET24a              | Expression vector with IPTG-inducible T7 promoter                              | Novagen                 |
| pQE801              | Expression vector with IPTG-inducible T5 promoter                              | Qiagen                  |
|                     |                                                                                |                         |
| pET24a(SufI-His)    | <i>E. coli</i> SufI with C-terminal 6X His tag in pET24a vector                | This work               |
| pQE801(SufI-FLAG)   | <i>E. coli</i> SufI with C-terminal FLAG tag in pQE801 vector                  | This work               |
| pNR14               | <i>E. coli</i> SufI in pT7.5 vector with T7 $\phi$ 10 promoter                 | (Stanley et al., 2000b) |
| pNR42               | Phage T7 polymerase and the temperature-sensitive $\lambda$ repressor in pSU18 | (Sargent et al., 1999)  |
| pTat101             | pTH19Kr derivative, a low copy vector, expression of TatABC                    | (Kneuper et al., 2012)  |
| pTat101His          | pTat101 with a C-terminal 6XHis tag in TatA                                    | This work               |
| pBAD33(TatAHis)     | TatA with a C-terminal 6XHis tag in pBAD33 vector                              | This work               |
| $\Delta$ TatA       | pTH19Kr derivative, a low copy vector, expression of TatBC                     | This work               |
| $\Delta$ TatB       | pTH19Kr derivative, a low copy vector, expression of TatAC                     | This work               |
| <b>TatA Mutants</b> |                                                                                |                         |
| ANa1                | pTat101 with one Ile addition after Ile6 in TatA                               | This work               |
| ANa2                | pTat101 with two Ile additions after Ile6 in TatA                              | This work               |
| ANa3                | pTat101 with three Ile additions after Ile6 in TatA                            | This work               |
| ANa4                | pTat101 with four Ile additions after Ile6 in TatA                             | This work               |
| ANa5                | pTat101 with five Ile additions after Ile6 in TatA                             | This work               |
| A7Wa3               | pTat101 with three Trp additions after Trp7 in TatA                            | This work               |
| A8Qa1               | pTat101 with one Leu addition after Gln8                                       | This work               |



|                 |                                                                                       |           |
|-----------------|---------------------------------------------------------------------------------------|-----------|
|                 | in TatA                                                                               |           |
| A8Qa2           | pTat101 with two Leu additions after Gln8 in TatA                                     | This work |
| A8Qa3           | pTat101 with three Leu additions after Gln8 in TatA                                   | This work |
| A8Qa4           | pTat101 with four Leu additions after Gln8 in TatA                                    | This work |
| A8Qa5           | pTat101 with five Leu additions after Gln8 in TatA                                    | This work |
| ACa1            | pTat101 with one Leu addition after Leu19 in TatA                                     | This work |
| ACa2            | pTat101 with two Leu additions after Leu19 in TatA                                    | This work |
| ACa3            | pTat101 with three Leu additions after Leu19 in TatA                                  | This work |
| ACa4            | pTat101 with four Leu additions after Leu19 in TatA                                   | This work |
| ACa5            | pTat101 with five Leu additions after Leu19 in TatA                                   | This work |
| pBAD33(ACa1His) | TatA with one Leu addition after Leu19 and a C-terminal 6XHis tag in pBAD33 vector    | This work |
| pBAD33(ACa2His) | TatA with two Leu additions after Leu19 and a C-terminal 6XHis tag in pBAD33 vector   | This work |
| pBAD33(ACa3His) | TatA with three Leu additions after Leu19 and a C-terminal 6XHis tag in pBAD33 vector | This work |
| pBAD33(ACa4His) | TatA with four Leu additions after Leu19 and a C-terminal 6XHis tag in pBAD33 vector  | This work |
| pBAD33(ACa5His) | TatA with five Leu additions after Leu19 and a C-terminal 6XHis tag in pBAD33 vector  | This work |
| Ad1             | pTat101 with Leu19 deletion in TatA                                                   | This work |
| Ad2             | pTat101 with Leu18 and Leu19 deletion in TatA                                         | This work |
| Ad3             | pTat101 with Val17, Leu18, and Leu19 deletion in TatA                                 | This work |
| Ad4             | pTat101 with Val16, Val17, Leu18, and Leu19 deletion in TatA                          | This work |
| Ad1His          | Ad1 mutant with 6XHis tag in TatA C-                                                  | This work |

|                     |                                                                                                |           |
|---------------------|------------------------------------------------------------------------------------------------|-----------|
|                     | terminus                                                                                       |           |
| Ad2His              | Ad2 mutant with 6XHis tag in TatA C-terminus                                                   | This work |
| Ad3His              | Ad3 mutant with 6XHis tag in TatA C-terminus                                                   | This work |
| Ad4His              | Ad4 mutant with 6XHis tag in TatA C-terminus                                                   | This work |
| pBAD33(Ad1His)      | TatA with Leu19 deletion and a C-terminal 6XHis tag in pBAD33 vector                           | This work |
| pBAD33(Ad2His)      | TatA with Leu18 and Leu19 deletions and a C-terminal 6XHis tag in pBAD33 vector                | This work |
| pBAD33(Ad3His)      | TatA with Val17, Leu18, and Leu19 deletions and a C-terminal 6XHis tag in pBAD33 vector        | This work |
| pBAD33(Ad4His)      | TatA with Val16, Val17, Leu18, and Leu19 deletions and a C-terminal 6XHis tag in pBAD33 vector | This work |
| <b>TatB Mutants</b> |                                                                                                |           |
| BNa1                | pTat101 with one Phe addition after Phe6 in TatB                                               | This work |
| BNa2                | pTat101 with two Phe additions after Phe6 in TatB                                              | This work |
| BNa3                | pTat101 with three Phe additions after Phe6 in TatB                                            | This work |
| BNa4                | pTat101 with four Phe additions after Phe6 in TatB                                             | This work |
| BNa5                | pTat101 with five Phe additions after Phe6 in TatB                                             | This work |
| B7Sa1E              | pTat101 with one Glu addition after Ser7 in TatB                                               | This work |
| B7Sa1L              | pTat101 with one Leu addition after Ser7 in TatB                                               | This work |
| B7Sa1S              | pTat101 with one Ser addition after Ser7 in TatB                                               | This work |
| B8Ea1               | pTat101 with one Leu addition after Glu8 in TatB                                               | This work |
| B8Ea2               | pTat101 with two Leu additions after Glu8 in TatB                                              | This work |
| B8Ea3               | pTat101 with three Leu additions after Glu8 in TatB                                            | This work |
| B8Ea4               | pTat101 with four Leu additions after Glu8 in TatB                                             | This work |

|                   |                                                              |           |
|-------------------|--------------------------------------------------------------|-----------|
|                   | in TatB                                                      |           |
| B8Ea5             | pTat101 with five Leu additions after Glu8 in TatB           | This work |
| BCa1              | pTat101 with one Leu addition after Leu19 in TatB            | This work |
| BCa2              | pTat101 with two Leu additions after Leu19 in TatB           | This work |
| BCa3              | pTat101 with three Leu additions after Leu19 in TatB         | This work |
| BCa4              | pTat101 with four Leu additions after Leu19 in TatB          | This work |
| BCa5              | pTat101 with five Leu additions after Leu19 in TatB          | This work |
| Bd1               | pTat101 with Val19 deletion in TatB                          | This work |
| Bd2               | pTat101 with Val18 and Val19 deletion in TatB                | This work |
| Bd3               | pTat101 with Leu17, Val18, and Val19 deletion in TatB        | This work |
| Bd4               | pTat101 with Gly16, Leu17, Val18, and Val19 deletion in TatB | This work |
| Bd4 $\Delta$ tatC | Bd4 mutant with TatC knockout mutation                       | This work |

976
